# Supplementary material
Source: PubMed Central journal article supplement (PMC3827683)
Supplement: NIHMS520321-supplement-1_si_001.pdf [file NIHMS520321-supplement-1_si_001.pdf]

# Supporting Information

for

## Structure-Guided Discovery of New Deaminase Enzymes

Daniel S. Hitchcock<sup>ϕ,θ</sup>, Hao Fan<sup>ψ,ζ,Σ,θ</sup>, Jungwook Kim<sup>ω</sup>, Matthew Vetting<sup>ω</sup>, Brandan Hillerich<sup>ω</sup>, Ronald D. Seidel<sup>ω</sup>, Steven C. Almo<sup>ω</sup>, Brian K. Shoichet<sup>ζ,Ω</sup>, Andrej Sali<sup>ψ,ζ,Ω</sup>,  
and Frank M. Raushel<sup>ϕ,π,2</sup>

<sup>ϕ</sup>Department of Biochemistry & Biophysics, <sup>π</sup>Department of Chemistry, Texas A&M University, College Station, Texas 77843; <sup>ψ</sup>Department of Bioengineering and Therapeutic Sciences, <sup>ζ</sup>Department of Pharmaceutical Chemistry, and <sup>Σ</sup>California Institute for Quantitative Biosciences, University of California, San Francisco; <sup>ω</sup>Department of Biochemistry, Albert Einstein College of Medicine, 1300 Morris Park Avenue, Bronx, New York 10461

**Physical Substrate Library.** The following compounds were tested for deamination with all purified enzymes: melamine, cytosine, thioguanine, guanine, adenine, 7-methylguanine, cytidine, 2'-deoxycytidine, pterin, biopterin, neopterin, guanosine, adenosine, 8-mercaptoguanine, 2,6-diaminopurine, xanthine, 8-oxoguanine, urate, 9-methylguanine, 6-chloropurine, 8-oxoadenine, isopentenyladenine, *N*6-methyladenine, 1-methyladenine, *cis*-zeatin, *trans*-zeatin, benzyladenine, 2-amino-6-benzylthiopurine, *N*-ethenopurine, *N*6-acyladenine, kinetin, *N*-dimethyladenine, *N*-butyladenine, isoguanine, 2-amino-6-methoxypurine, 6-methylthiopurine, 2-chloroadenine, 6-methoxyadenine, 6-mercaptopurine, 7-methyladenine, 2-dimethylaminoadenine, 3-iminisoindolinone, acycloguanosine, 2'-deoxyguanosine, xanthosine, 2'-deoxyadenosine, 3'-deoxyadenosine, 5'-deoxyadenosine, 2',5'-dideoxyadenosine, 5'-amino-5'-deoxyadenosine, 5'-chloro-5'-deoxyadenosine, 5'-deoxy-5'-methylthioadenosine, *S*-adenosylhomocysteine, *S*-adenosylthiopropylamine *N*6-methyl-2'-deoxyadenosine, isoguanine, 2'-deoxyisoguanine, cytosine- $\beta$ -D-arabinofuranose, *N*-methylcytidine, 5-methyl-2'-deoxycytidine, 5-hydroxymethylcytidine, 2,4-diaminopyrimidine, 4,6-diaminopyrimidine, 4-amino-2,6-dihydroxypyrimidine, 2-amino-4,6-dihydroxypyrimidine, 5-methylcytosine, 5-hydroxymethylcytosine, 5-carboxycytosine, 5-aminocytosine, 5-fluorocytosine, 5-chlorocytosine, 4-hydroxy-2,5,6-triaminopyrimidine, *N*-methylcytosine, 3-methylcytosine, 2,6-diaminopyrimidine, 2,4,6-triaminopyrimidine, uracil, 5-aminouracil, 5-formyluracil, 5-fluorouracil, 3-oxauracil, 5-hydroxymethyluracil, 6-hydroxyaminouracil, thiamine, 2-aminopyrimidine, 4-aminopyrimidine, toxopyrimidine, sulfamonomethoxine, 4-thiouracil, 2-thiouracil, thymine, 5-azacytosine, ammeline, ammelide, cyanuric acid, 2-amino-4-

hydroxy-6-chlorotriazine, cyromazin, *N*-ethylammeline, desethylatrazine, 6-azacytosine, 2-aminopyridine, 2,6-diaminopyridine, 4,6-diamino-2-hydroxypyridine, 4-aminopyridine, 4-dimethylaminopyridine, creatinine, 5-amino-4-imidazolecarboxamide, 5-hydantoin acetic acid, 3-amino-5-mercapto-1,2,4-triazole, 3-amino-5-carboxy-1,2,4-triazole, dihydrouracil, dihydrothymine, and dihydroorotate.

**Crystallization and Data Collection.** All crystallization experiments were carried out by the sitting drop vapor diffusion method at 18 °C in 96 well Intelliplates (ART ROBBINS INSTRUMENTS). Equal volumes of crystallization reagent and protein (0.5 + 0.5  $\mu$ L) were mixed and equilibrated against 70  $\mu$ L of the crystallization agent in the reservoir. Crystals of Cv\_1032 (11.5 mg/mL in 20 mM HEPES, pH 7.8, 150 mM NaCl, 10% glycerol (w/v), 5 mM DTT and 5 mM inosine or 5 mM 5'-deoxy-5'-methylthioadenosine) were obtained with 10% (w/v) Peg20000, 100 mM BICINE, pH 9.0, 2% (v/v) dioxane. Crystals were soaked in mother liquor supplemented with 20% (v/v) glycerol and 5 mM inosine or 5 mM MTA for 30 s prior to flash-cooling in liquid nitrogen. Crystals of Xcc22270 (16.6 mg/mL in 20 mM HEPES pH 7.8, 150 mM NaCl, 10% (w/v) glycerol, 5 mM DTT, 5 mM MgCl<sub>2</sub>) were obtained with 1.0 M succinic acid pH 7.0, 100 mM HEPES pH 7.0, 1% PEG MME2000. Crystals were soaked in mother liquor supplemented with 20% (v/v) glycerol, 10 mM ZnCl<sub>2</sub> and 10 mM inosine (not seen in electron density) prior to flash-cooling in liquid nitrogen. Crystals of PA3170 (18.0 mg/mL in 20 mM HEPES pH 7.8, 150 mM NaCl, 10% (w/v) glycerol, 5 mM DTT) were obtained with 0.2M MgCl<sub>2</sub>, 100 mM Bis-Tris pH 6.5, 25% (w/v) Peg3350. Crystals were soaked in mother liquor supplemented with 20% (v/v) glycerol prior to flash-cooling in liquid nitrogen. All X-ray diffraction data were collected at 100 K using synchrotron radiation ( $\lambda = 0.98$ ) and intensities were integrated and scaled with

HKL3000 (1). Data for Cv1032 were collected on a Quantum 315 CCD detector (Area Detector Systems Corp) at NSLS beamline X29A (National Synchrotron Light Source, Brookhaven National Laboratory). Data for Xcc2270 and PA3170 were collected on a Rayonix 225-HE detector at APS beamline 31-ID (Advanced Photon Source, Argonne National Laboratory).

**Phasing and Refinement.** The Cv1032-inosine complex was phased by single anomalous dispersion (SAD) phasing using the program PHENIX (2) and selenomethionine labeled protein(3). The initial solvent flattened SAD map was of sufficient quality for the program ARP/WARP (4) to autobuild a majority of the structure. The Cv1032-MTA complex was isomorphous to the Cv1032 inosine complex. Xcc2270 was phased by molecular replacement utilizing the program PHASER (5) and a monomer of a related amidohydrolase family member (MCSG, PDB code: 3LNP, 43% identity) while Pa3170 was phased by molecular replacement with the program PHASER and a monomer of XCC2270 as the search model. Models were completed with iterative cycles of model building with the molecular graphics package COOT (6) and refinement in either PHENIX (4F0S, 4DZH, 4DYK) or REFMAC(7) (4F0R). Ligands to Cv1032 were introduced during the final rounds of refinement with geometric constraints produced by the PRODRG2 server (8).

| <b>Subgroup</b> | <b>Organism</b>                                                     | <b>gi</b> | <b>Locus tag</b> | <b>Sequence identity to Tm0936</b> |
|-----------------|---------------------------------------------------------------------|-----------|------------------|------------------------------------|
| 1a              | <i>Clostridium thermocellum</i> ATCC 27405                          | 125973714 | Cthe1199         | 42%                                |
| 1b              | <i>Methanosarcina mazei</i> Go1                                     | 21228381  | Mm2279           | 40%                                |
| 2               | <i>Chromobacterium violaceum</i> ATCC 12472                         | 34496487  | Cv1032           | 32%                                |
| 2               | <i>Pseudomonas fluorescens</i> Pf0-1                                | 77460301  | Pfl4080          | 34%                                |
| 2               | <i>Xanthomonas campestris</i> pv. <i>campestris</i> str. ATCC 33913 | 21231708  | Xcc2270          | 34%                                |
| 2               | <i>Pseudomonas aeruginosa</i> PAO1                                  | 15598366  | Pa3170           | 33%                                |
| 3               | <i>Clostridium perfringens</i> ATCC 13124                           | 110799822 | Cpf1475          | 31%                                |
| 3               | <i>Enterococcus faecalis</i> V583                                   | 29375796  | Ef1223           | 28%                                |
| 4               | <i>Bacillus cereus</i> ATCC 14579                                   | 29895480  | Bc1793           | 36%                                |
| 5               | <i>Streptococcus pneumoniae</i> ATCC 700669                         | 221232098 | Spn13210         | 33%                                |
| 6               | <i>Desulfovibrio vulgaris</i> str. Hildenborough                    | 46580235  | Dvu1825          | 36%                                |
| 7               | <i>Chloroflexus aurantiacus</i> J-10-fl                             | 163847463 | Caur1903         | 32%                                |
| 8               | <i>Thermotoga maritima</i> MSB8                                     | 15643698  | Tm0936           | 100%                               |
| 9               | <i>Moorella thermoacetica</i> ATCC 39073                            | 83590072  | Moth1224         | 32% (31%)*                         |
| 10              | <i>Agrobacterium vitis</i> S4                                       | 222106480 | Avi5431          | 31%                                |
| 11              | <i>Thermoplasma volcanium</i> GSS1                                  | 13541346  | Tvn0515          | 30%                                |

\* Sequence identity in parenthesis is measured between the target sequence and the template Tm0936.

**Table S2.**

| <b>DATASET STATISTICS<sup>a</sup></b>         | Cv1032<br>(Zn-INOSINE)       | Cv1032<br>(Zn-MTA)           | Xcc2270 (ZN)                                 | Pa3170 (ZN)                    |
|-----------------------------------------------|------------------------------|------------------------------|----------------------------------------------|--------------------------------|
| Space Group                                   | P41212                       | P41212                       | C2                                           | P212121                        |
| Unit Cell (Å , °)                             | $a=b=101.1$ $c=88.0$         | $a=b=101.1$ $c=88.6$         | $a=133.6$ $b=51.2$<br>$c=67.4$ $\beta=106.5$ | $a=73.9$ $b=98.7$<br>$c=119.8$ |
| Resolution (Å)                                | 50-1.85 (1.88-1.85)          | 50-1.8 (1.83-1.8)            | 50-1.53 (1.65-1.55)                          | 50-2.0 (2.03-2.0)              |
| Completeness (%)                              | 98.1 (98.6)                  | 99.2 (100.0)                 | 99.6 (100.0)                                 | 99.6 (98.9)                    |
| Redundancy                                    | 11.4 (11.4)                  | 6.1 (5.8)                    | 3.7 (3.7)                                    | 5.2 (4.7)                      |
| Mean(I)/sd(I)                                 | 21.9 (4.3)                   | 23.2 (2.3)                   | 18.9 (2.8)                                   | 11.2 (2.7)                     |
| $R_{\text{sym}}$                              | 0.140 (0.870)                | 0.102 (0.799)                | 0.068 (0.527)                                | 0.068 (0.753)                  |
| <b>STRUCTURE STATISTICS</b>                   |                              |                              |                                              |                                |
| Resolution (Å)                                | 40.3-1.85 (1.90-1.85)        | 50-1.80 (1.85-1.80)          | 50-1.53 (1.57-1.55)                          | 50-2.0 (2.05-2.0)              |
| Unique reflections                            | 39008 (2648)                 | 41034 (2892)                 | 65346 (2581)                                 | 55862 (3609)                   |
| $R_{\text{cryst}}$ (%)                        | 15.7 (16.2)                  | 16.3 (19.0)                  | 20.8 (31.6)                                  | 17.6 (27.6)                    |
| $R_{\text{free}}$ (% , 5% of data)            | 18.5 (19.2)                  | 19.9 (22.2)                  | 23.3 (36.8)                                  | 22.4 (35.4)                    |
| Contents of model (Native Range) <sup>b</sup> | 1-439                        | 1-439                        | 1-449                                        | 1-444                          |
| Observed residues                             | A5-438                       | A5-440                       | A9-447                                       | A6-442, B6-442                 |
| Waters                                        | 299                          | 325                          | 247                                          | 309                            |
| Atoms total                                   | 3674                         | 3646                         | 3673                                         | 7035                           |
| Average B-factor (Å <sup>2</sup> )            |                              |                              |                                              |                                |
| TLS groups (#)                                | 0                            | 0                            | 2                                            | 8                              |
| Protein/Waters/Ligand/Zn                      | 18.6/26.1/19.1/-             | 20.2/30.8/28.7/15.2          | 25.8/17.6/-/32.3                             | 45.4/43.4/-/33.5               |
| <b>RMSD</b>                                   |                              |                              |                                              |                                |
| Bond lengths (Å) /Angles (°)                  | 0.007/1.082                  | 0.015/1.338                  | 0.024/1.508                                  | 0.008/1.103                    |
| <b>MOLPROBITY STATISTICS</b>                  |                              |                              |                                              |                                |
| Ramachandran Favored / Outliers (%)           | 97.0 (0.23)                  | 97.0 (0.23)                  | 96.3 (0.23)                                  | 96.3 (0.3)                     |
| Rotamer Outliers (%)                          | 0.0                          | 0.29                         | 1.2                                          | 2.0                            |
| Clashscore <sup>d</sup>                       | 4.36 (98 <sup>th</sup> pctl) | 5.87 (94 <sup>th</sup> pctl) | 5.25 (92 <sup>nd</sup> pctl)                 | 7.99 (90 <sup>th</sup> pctl)   |
| Overall score <sup>d</sup>                    | 1.39 (97 <sup>th</sup> pctl) | 1.49 (94 <sup>th</sup> pctl) | 1.57 (83 <sup>rd</sup> pctl)                 | 1.91 (80 <sup>th</sup> pctl)   |
| PDB ID                                        | 4F0S                         | 4FOR                         | 4DZH                                         | 4DYK                           |

<sup>a</sup> Statistics in parenthesis are for the highest resolution bin

<sup>b</sup> numbering outside of listed native range are polyhistidine tags or cloning artifacts

<sup>c</sup> Scores are ranked according to structures of similar resolution as formulated in MOLPROBITY

| <b>Table S3.</b> Substrates predicted for Moth1224 |                                    |                                |
|----------------------------------------------------|------------------------------------|--------------------------------|
| <b>Compound</b>                                    | <b>Homology models of Moth1224</b> |                                |
|                                                    | <b>Model 1 (based on 2PLM)</b>     | <b>Model 2 (based on 2UZ9)</b> |
| Adenosine                                          | 25                                 |                                |
| 5'-Methylthioadenosine                             | 31                                 |                                |
| 5'-Deoxyadenosine                                  | 40                                 |                                |
| <b>Guanine</b>                                     |                                    | 10                             |
| 8-oxoguanine                                       |                                    | 29                             |
| Thioguanine                                        |                                    | 35                             |
| The true substrate, guanine, is marked in bold.    |                                    |                                |

**Table S4.** Kinetic constants of adenosine deaminating enzymes

| Locus Tag | Subgroup | 5dAdo                     |                      |                                     | Ado                       |                      |                                     | MTA                       |                      |                                     | SAH                       |                      |                                     | TPA                       |                      |                                     |
|-----------|----------|---------------------------|----------------------|-------------------------------------|---------------------------|----------------------|-------------------------------------|---------------------------|----------------------|-------------------------------------|---------------------------|----------------------|-------------------------------------|---------------------------|----------------------|-------------------------------------|
|           |          | $k_{cat}$<br>( $s^{-1}$ ) | $K_m$<br>( $\mu M$ ) | $k_{cat}/K_m$<br>( $M^{-1}s^{-1}$ ) | $k_{cat}$<br>( $s^{-1}$ ) | $K_m$<br>( $\mu M$ ) | $k_{cat}/K_m$<br>( $M^{-1}s^{-1}$ ) | $k_{cat}$<br>( $s^{-1}$ ) | $K_m$<br>( $\mu M$ ) | $k_{cat}/K_m$<br>( $M^{-1}s^{-1}$ ) | $k_{cat}$<br>( $s^{-1}$ ) | $K_m$<br>( $\mu M$ ) | $k_{cat}/K_m$<br>( $M^{-1}s^{-1}$ ) | $k_{cat}$<br>( $s^{-1}$ ) | $K_m$<br>( $\mu M$ ) | $k_{cat}/K_m$<br>( $M^{-1}s^{-1}$ ) |
| Cthe1199  | 1a       | 3.9 ± 0.1                 | 78 ± 7               | 5.0 (0.3) × 10 <sup>4</sup>         | 2.6 ± 0.1                 | 160 ± 20             | 1.6 (0.1) × 10 <sup>4</sup>         | 25 ± 2                    | 9 ± 1                | 2.9 (0.6) × 10 <sup>6</sup>         | 25.6 ± 0.5                | 1.8 ± 0.2            | 1.4 (0.1) × 10 <sup>7</sup>         | 23 ± 1                    | 4.4 ± 0.7            | 5.2 (0.5) × 10 <sup>6</sup>         |
| Mm2279    | 1b       | 27 ± 2                    | 2.3 ± 0.4            | 1.2 (0.1) × 10 <sup>7</sup>         | 7.9 ± .7                  | 36 ± 8               | 2.2 (0.3) × 10 <sup>5</sup>         | 16 ± 1                    | 0.9 ± 0.3            | 1.7 (0.4) × 10 <sup>7</sup>         | 34 ± 3                    | 2.7 ± 0.6            | 13 (2) × 10 <sup>7</sup>            | 16 ± 1                    | 2.1 ± 0.4            | 7.6 (1) × 10 <sup>6</sup>           |
| Cv1032    | 2        | 105 ± 3                   | 31 ± 3               | 3.4 (0.3) × 10 <sup>6</sup>         | 107 ± 4                   | 16 ± 3               | 6.6 (1) × 10 <sup>5</sup>           | 18.2 ± 0.3                | 16 ± 1               | 1.2 (0.1) × 10 <sup>6</sup>         | ND                        | ND                   | <100                                | ND                        | ND                   | <100                                |
| Pfl4080   | 2        | 119 ± 3                   | 13 ± 1               | 8.9 (0.6) × 10 <sup>6</sup>         | 40 ± 1                    | 90 ± 10              | 4.6 (0.2) × 10 <sup>5</sup>         | 57 ± 2                    | 4 ± 1                | 1.3 (0.1) × 10 <sup>7</sup>         | ND                        | ND                   | <100                                | ND                        | ND                   | <100                                |
| Xcc2270   | 2        | 67 ± 1                    | 14 ± 1               | 4.7 (0.2) × 10 <sup>6</sup>         | 80 ± 2                    | 24 ± 2               | 3.4 (0.1) × 10 <sup>6</sup>         | 74 ± 2                    | 11 ± 1               | 6.8 (0.4) × 10 <sup>6</sup>         | ND                        | ND                   | <100                                | ND                        | ND                   | <100                                |
| Pa3170    | 2        | 180 ± 3                   | 4.0 ± 0.3            | 4.5 (0.2) × 10 <sup>7</sup>         | 131 ± 9                   | 14 ± 3               | 9.6 (1.3) × 10 <sup>6</sup>         | 155 ± 3                   | 1.9 ± 0.2            | 8.2 (0.8) × 10 <sup>7</sup>         | ND                        | ND                   | <100                                | ND                        | ND                   | <100                                |
| Bc1793    | 4        | 41 ± 1                    | 130 ± 20             | 3.6 (0.3) × 10 <sup>5</sup>         | 46 ± 2                    | 120 ± 10             | 3.7 (1) × 10 <sup>5</sup>           | ND                        | ND                   | <100                                | ND                        | ND                   | <100                                | ND                        | ND                   | <100                                |
| Spn13210  | 5        | 850 ± 60                  | 60 ± 10              | 15 (2) × 10 <sup>6</sup>            | 660 ± 40                  | 90 ± 10              | 7.2 (0.4) × 10 <sup>6</sup>         | ND                        | ND                   | <100                                | ND                        | ND                   | <100                                | ND                        | ND                   | <100                                |
| Dvu1825   | 6        | 38.7 ± 0.5                | 3.3 ± 0.2            | 1.2 (0.1) × 10 <sup>7</sup>         | 43 ± 3                    | 170 ± 20             | 2.6 (0.2) × 10 <sup>5</sup>         | ND                        | ND                   | 620 ± 40                            | ND                        | ND                   | <100                                | ND                        | ND                   | <100                                |
| Caur1903  | 7        | 2.58 ± 0.05               | 11 ± 1               | 2.3 (0.1) × 10 <sup>5</sup>         | 1.44 ± 0.04               | 5.6 ± 0.7            | 2.6 (0.3) × 10 <sup>5</sup>         | ND                        | ND                   | <100                                | ND                        | ND                   | <100                                | ND                        | ND                   | <100                                |
| Tm0936    | 8        | 1.4 ± 0.1                 | 39 ± 7               | 3.8 (0.5) × 10 <sup>4</sup>         | 2.2 ± 0.2                 | 13 ± 4               | 1.7 (0.3) × 10 <sup>5</sup>         | 6.0 ± 0.3                 | 4.0 ± 0.3            | 1.5 (0.1) × 10 <sup>6</sup>         | 7.1 ± 0.4                 | 0.6 ± 0.2            | 1.1 (0.3) × 10 <sup>6</sup>         | 17 ± 1                    | 9 ± 2                | 1.9 (0.2) × 10 <sup>6</sup>         |
| Tvn0515   | 11       | ND                        | ND                   | <100                                | ND                        | ND                   | <100                                | ND                        | ND                   | <100                                | 2.77 ± 0.05               | 11 ± 1               | 2.6 (0.2) × 10 <sup>5</sup>         | ND                        | ND                   | <100                                |



**Table S5. Kinetic constants of non-adenosine deaminating enzymes**

| Locus Tag | Subgroup | Substrate    | $k_{\text{cat}}$ ( $\text{s}^{-1}$ ) | $K_m$ ( $\mu\text{M}$ ) | $k_{\text{cat}}/K_m$ ( $\text{M}^{-1}\text{s}^{-1}$ ) |
|-----------|----------|--------------|--------------------------------------|-------------------------|-------------------------------------------------------|
| Moth1224  | 9        | Guanine      | $0.48 \pm 0.02$                      | $4.1 \pm 0.6$           | $1.2 (0.1) \times 10^5$                               |
| Avi5431   | 10       | 8-oxoadenine | $3.4 \pm 0.2$                        | $19 \pm 3$              | $1.8 (0.2) \times 10^5$                               |
|           |          | 2-oxoadenine | $13 \pm 3$                           | $600 \pm 200$           | $2.3 (0.2) \times 10^4$                               |

**Table S6.** Provisional annotation of enzymes in Group 1

|                                           |           |      |                           |
|-------------------------------------------|-----------|------|---------------------------|
| Acetonema longum DSM 6540                 | 338814514 | Sg1a | SAH/MTA Deaminase         |
| Acidaminococcus fermentans DSM 20731      | 284048666 | Sg1a | SAH/MTA Deaminase         |
| Acidaminococcus intestini RyC-MR95        | 352684529 | Sg1a | SAH/MTA Deaminase         |
| Acidaminococcus sp. D21                   | 227498515 | Sg1a | SAH/MTA Deaminase         |
| Acidithiobacillus caldus ATCC 51756       | 255021229 | Sg2  | MTA/5'-dAdo/Ado Deaminase |
| Acidithiobacillus ferrivorans SS3         | 344200120 | Sg2  | MTA/5'-dAdo/Ado Deaminase |
| Acidithiobacillus ferrooxidans ATCC 53993 | 198283616 | Sg2  | MTA/5'-dAdo/Ado Deaminase |
| Acidithiobacillus thiooxidans ATCC 19377  | 384084622 | Sg2  | MTA/5'-dAdo/Ado Deaminase |
| Aciduliprofundum boonei T469              | 254166651 | Sg11 | SAH Deaminase             |
| Aciduliprofundum boonei T469              | 254167272 | Sg11 | SAH Deaminase             |
| Acinetobacter lwoffii SH145               | 262376404 | Sg10 | 8-Oxoadenine Deaminase    |
| Acinetobacter sp. HA                      | 389704937 | Sg10 | 8-Oxoadenine Deaminase    |
| Agrobacterium vitis S4                    | 222106480 | Sg10 | 8-Oxoadenine Deaminase    |
| Akkermansia muciniphila ATCC BAA-835      | 187736175 | Sg6  | 5'-dAdo Deaminase         |
| Albugo laibachii Nc14                     | 325189944 | Sg2  | MTA/5'-dAdo/Ado Deaminase |
| Albugo laibachii Nc14                     | 325189945 | Sg2  | MTA/5'-dAdo/Ado Deaminase |
| Alcanivorax borkumensis SK2               | 110834613 | Sg2  | MTA/5'-dAdo/Ado Deaminase |
| Alcanivorax dieselolei B5                 | 407696804 | Sg2  | MTA/5'-dAdo/Ado Deaminase |
| Alcanivorax hongdengensis A-11-3          | 408375135 | Sg2  | MTA/5'-dAdo/Ado Deaminase |
| Alcanivorax pacificus W11-5               | 407802061 | Sg2  | MTA/5'-dAdo/Ado Deaminase |
| Alcanivorax sp. DG881                     | 254429653 | Sg2  | MTA/5'-dAdo/Ado Deaminase |
| Alkalilimnicola ehrlichii MLHE-1          | 114320072 | Sg2  | MTA/5'-dAdo/Ado Deaminase |
| Alkaliphilus metalliredigens QYMF         | 150392253 | Sg9  | Guanine Deaminase         |
| Alkaliphilus oremlandii OhILAs            | 158319425 | Sg9  | Guanine Deaminase         |
| Allochromatium vinosum DSM 180            | 288941706 | Sg2  | MTA/5'-dAdo/Ado Deaminase |
| Alteromonas sp. S89                       | 372267296 | Sg2  | MTA/5'-dAdo/Ado Deaminase |
| Ammonifex degensii KC4                    | 260892855 | Sg1a | SAH/MTA Deaminase         |
| Anaerococcus hydrogenalis ACS-025-V-Sch4  | 325846621 | Sg1a | SAH/MTA Deaminase         |
| Anaerococcus hydrogenalis DSM 7454        | 212696141 | Sg1a | SAH/MTA Deaminase         |
| Anaerococcus prevotii ACS-065-V-Col13     | 325479377 | Sg1a | SAH/MTA Deaminase         |
| Anaerococcus prevotii DSM 20548           | 257066470 | Sg1a | SAH/MTA Deaminase         |
| Anaerolinea thermophila UNI-1             | 320161507 | Sg7  | 5'-dAdo/Ado Deaminase     |
| Archaeoglobus fulgidus DSM 4304           | 11498602  | Sg1b | SAH/MTA/5'-dAdo Deaminase |
| Archaeoglobus profundus DSM 5631          | 284161269 | Sg1b | SAH/MTA/5'-dAdo Deaminase |
| Archaeoglobus veneficus SNP6              | 327401019 | Sg1b | SAH/MTA/5'-dAdo Deaminase |
| Aromatoleum aromaticum EbN1               | 56475928  | Sg2  | MTA/5'-dAdo/Ado Deaminase |
| Azoarcus sp. BH72                         | 119898878 | Sg2  | MTA/5'-dAdo/Ado Deaminase |
| Azoarcus sp. KH32C                        | 358638550 | Sg2  | MTA/5'-dAdo/Ado Deaminase |
| Azotobacter vinelandii DJ                 | 226943694 | Sg2  | MTA/5'-dAdo/Ado Deaminase |
| Bacillus alcalophilus ATCC 27647          | 402299138 | Sg1a | SAH/MTA Deaminase         |
| Bacillus alcalophilus ATCC 27647          | 402299011 | Sg9  | Guanine Deaminase         |
| Bacillus anthracis str. A2012             | 65319185  | Sg4  | 5'-dAdo/Ado Deaminase     |
| Bacillus anthracis str. Ames              | 30261905  | Sg4  | 5'-dAdo/Ado Deaminase     |
| Bacillus cellulosilyticus DSM 2522        | 317128620 | Sg1a | SAH/MTA Deaminase         |
| Bacillus cereus 03BB102                   | 225863770 | Sg4  | 5'-dAdo/Ado Deaminase     |
| Bacillus cereus 03BB108                   | 196045020 | Sg4  | 5'-dAdo/Ado Deaminase     |
| Bacillus cereus 172560W                   | 229178305 | Sg4  | 5'-dAdo/Ado Deaminase     |
| Bacillus cereus 95/8201                   | 229121453 | Sg4  | 5'-dAdo/Ado Deaminase     |
| Bacillus cereus AH1134                    | 206970647 | Sg4  | 5'-dAdo/Ado Deaminase     |
| Bacillus cereus AH1271                    | 229029603 | Sg4  | 5'-dAdo/Ado Deaminase     |
| Bacillus cereus AH1273                    | 229017192 | Sg4  | 5'-dAdo/Ado Deaminase     |
| Bacillus cereus AH187                     | 217959387 | Sg4  | 5'-dAdo/Ado Deaminase     |
| Bacillus cereus AH603                     | 229059557 | Sg4  | 5'-dAdo/Ado Deaminase     |
| Bacillus cereus AH621                     | 229166770 | Sg4  | 5'-dAdo/Ado Deaminase     |
| Bacillus cereus AH676                     | 229043659 | Sg4  | 5'-dAdo/Ado Deaminase     |
| Bacillus cereus AND1407                   | 401100969 | Sg4  | 5'-dAdo/Ado Deaminase     |
| Bacillus cereus ATCC 10876                | 229189999 | Sg4  | 5'-dAdo/Ado Deaminase     |
| Bacillus cereus ATCC 10987                | 2462117   | Sg4  | 5'-dAdo/Ado Deaminase     |
| Bacillus cereus ATCC 10987                | 42736941  | Sg4  | 5'-dAdo/Ado Deaminase     |
| Bacillus cereus ATCC 14579                | 30019935  | Sg4  | 5'-dAdo/Ado Deaminase     |
| Bacillus cereus ATCC 4342                 | 229155478 | Sg4  | 5'-dAdo/Ado Deaminase     |
| Bacillus cereus B4264                     | 218233043 | Sg4  | 5'-dAdo/Ado Deaminase     |
| Bacillus cereus BAG1X1-2                  | 401644151 | Sg4  | 5'-dAdo/Ado Deaminase     |

|                                          |           |      |                       |
|------------------------------------------|-----------|------|-----------------------|
| Bacillus cereus BAG1X1-3                 | 401637644 | Sg4  | 5'-dAdo/Ado Deaminase |
| Bacillus cereus BAG2X1-1                 | 401649456 | Sg4  | 5'-dAdo/Ado Deaminase |
| Bacillus cereus BAG2X1-2                 | 401647728 | Sg4  | 5'-dAdo/Ado Deaminase |
| Bacillus cereus BAG3X2-1                 | 401102048 | Sg4  | 5'-dAdo/Ado Deaminase |
| Bacillus cereus BAG5X1-1                 | 401135601 | Sg4  | 5'-dAdo/Ado Deaminase |
| Bacillus cereus BAG5X2-1                 | 401140262 | Sg4  | 5'-dAdo/Ado Deaminase |
| Bacillus cereus BAG6X1-1                 | 402435656 | Sg4  | 5'-dAdo/Ado Deaminase |
| Bacillus cereus BAG6X1-2                 | 401144982 | Sg4  | 5'-dAdo/Ado Deaminase |
| Bacillus cereus BDRD-Cer4                | 229127222 | Sg4  | 5'-dAdo/Ado Deaminase |
| Bacillus cereus BDRD-ST196               | 229132732 | Sg4  | 5'-dAdo/Ado Deaminase |
| Bacillus cereus BDRD-ST26                | 229138605 | Sg4  | 5'-dAdo/Ado Deaminase |
| Bacillus cereus biovar anthracis str. CI | 301053436 | Sg4  | 5'-dAdo/Ado Deaminase |
| Bacillus cereus E33L                     | 51977022  | Sg4  | 5'-dAdo/Ado Deaminase |
| Bacillus cereus F65185                   | 229069450 | Sg4  | 5'-dAdo/Ado Deaminase |
| Bacillus cereus F837/76                  | 376265752 | Sg4  | 5'-dAdo/Ado Deaminase |
| Bacillus cereus FRI-35                   | 402557855 | Sg4  | 5'-dAdo/Ado Deaminase |
| Bacillus cereus G9241                    | 47565590  | Sg4  | 5'-dAdo/Ado Deaminase |
| Bacillus cereus G9842                    | 218896835 | Sg4  | 5'-dAdo/Ado Deaminase |
| Bacillus cereus H3081.97                 | 206975034 | Sg4  | 5'-dAdo/Ado Deaminase |
| Bacillus cereus HuA2-1                   | 402455989 | Sg4  | 5'-dAdo/Ado Deaminase |
| Bacillus cereus HuA2-4                   | 401165478 | Sg4  | 5'-dAdo/Ado Deaminase |
| Bacillus cereus HuA4-10                  | 401170102 | Sg4  | 5'-dAdo/Ado Deaminase |
| Bacillus cereus HuB1-1                   | 402446765 | Sg4  | 5'-dAdo/Ado Deaminase |
| Bacillus cereus ISP3191                  | 401186307 | Sg4  | 5'-dAdo/Ado Deaminase |
| Bacillus cereus m1293                    | 229196109 | Sg4  | 5'-dAdo/Ado Deaminase |
| Bacillus cereus m1550                    | 229150105 | Sg4  | 5'-dAdo/Ado Deaminase |
| Bacillus cereus MC67                     | 401196778 | Sg4  | 5'-dAdo/Ado Deaminase |
| Bacillus cereus MM3                      | 229172558 | Sg4  | 5'-dAdo/Ado Deaminase |
| Bacillus cereus NVH0597-99               | 196041244 | Sg4  | 5'-dAdo/Ado Deaminase |
| Bacillus cereus Q1                       | 222095526 | Sg4  | 5'-dAdo/Ado Deaminase |
| Bacillus cereus R309803                  | 229160865 | Sg4  | 5'-dAdo/Ado Deaminase |
| Bacillus cereus Rock1-15                 | 229109356 | Sg4  | 5'-dAdo/Ado Deaminase |
| Bacillus cereus Rock1-3                  | 229115336 | Sg4  | 5'-dAdo/Ado Deaminase |
| Bacillus cereus Rock3-28                 | 229102492 | Sg4  | 5'-dAdo/Ado Deaminase |
| Bacillus cereus Rock3-42                 | 229090873 | Sg4  | 5'-dAdo/Ado Deaminase |
| Bacillus cereus Rock3-44                 | 229084858 | Sg4  | 5'-dAdo/Ado Deaminase |
| Bacillus cereus Rock4-18                 | 229074831 | Sg4  | 5'-dAdo/Ado Deaminase |
| Bacillus cereus Rock4-2                  | 229079081 | Sg4  | 5'-dAdo/Ado Deaminase |
| Bacillus cereus VD014                    | 401217546 | Sg4  | 5'-dAdo/Ado Deaminase |
| Bacillus cereus VD045                    | 401227400 | Sg4  | 5'-dAdo/Ado Deaminase |
| Bacillus cereus VD048                    | 401224952 | Sg4  | 5'-dAdo/Ado Deaminase |
| Bacillus cereus VD078                    | 401231302 | Sg4  | 5'-dAdo/Ado Deaminase |
| Bacillus cereus VD102                    | 401241928 | Sg4  | 5'-dAdo/Ado Deaminase |
| Bacillus cereus VD107                    | 401249584 | Sg4  | 5'-dAdo/Ado Deaminase |
| Bacillus cereus VD115                    | 401253694 | Sg4  | 5'-dAdo/Ado Deaminase |
| Bacillus cereus VD156                    | 401273332 | Sg4  | 5'-dAdo/Ado Deaminase |
| Bacillus cereus VD166                    | 401275063 | Sg4  | 5'-dAdo/Ado Deaminase |
| Bacillus cereus VD169                    | 401285773 | Sg4  | 5'-dAdo/Ado Deaminase |
| Bacillus cereus VD200                    | 401294813 | Sg4  | 5'-dAdo/Ado Deaminase |
| Bacillus cereus VDM022                   | 401296447 | Sg4  | 5'-dAdo/Ado Deaminase |
| Bacillus cereus VDM034                   | 401303214 | Sg4  | 5'-dAdo/Ado Deaminase |
| Bacillus cereus VDM062                   | 401307506 | Sg4  | 5'-dAdo/Ado Deaminase |
| Bacillus clausii KSM-K16                 | 56963827  | Sg1a | SAH/MTA Deaminase     |
| Bacillus cytotoxicus NVH 391-98          | 152975255 | Sg4  | 5'-dAdo/Ado Deaminase |
| Bacillus halodurans C-125                | 15614255  | Sg1a | SAH/MTA Deaminase     |
| Bacillus halodurans C-125                | 162416220 | Sg1a | SAH/MTA Deaminase     |
| Bacillus halodurans C-125                | 15613309  | Sg9  | Guanine Deaminase     |
| Bacillus macauensis ZFHKF-1              | 392958953 | Sg1a | SAH/MTA Deaminase     |
| Bacillus megaterium DSM 319              | 295703084 | Sg9  | Guanine Deaminase     |
| Bacillus megaterium QM B1551             | 294497714 | Sg9  | Guanine Deaminase     |
| Bacillus megaterium WSH-002              | 384048466 | Sg9  | Guanine Deaminase     |
| Bacillus methanolicus PB1                | 387928511 | Sg9  | Guanine Deaminase     |
| Bacillus mycoides DSM 2048               | 229011199 | Sg4  | 5'-dAdo/Ado Deaminase |
| Bacillus mycoides Rock1-4                | 229007884 | Sg4  | 5'-dAdo/Ado Deaminase |
| Bacillus mycoides Rock3-17               | 228996976 | Sg4  | 5'-dAdo/Ado Deaminase |
| Bacillus pseudofirmus OF4                | 288556132 | Sg1a | SAH/MTA Deaminase     |

|                                                          |           |      |                           |
|----------------------------------------------------------|-----------|------|---------------------------|
| Bacillus pseudomycooides DSM 12442                       | 228990902 | Sg4  | 5'-dAdo/Ado Deaminase     |
| Bacillus selenitireducens MLS10                          | 297584388 | Sg1a | SAH/MTA Deaminase         |
| Bacillus selenitireducens MLS10                          | 297582902 | Sg9  | Guanine Deaminase         |
| Bacillus smithii 7_3_47FAA                               | 365158272 | Sg9  | Guanine Deaminase         |
| Bacillus sp. 1NLA3E                                      | 373858121 | Sg9  | Guanine Deaminase         |
| Bacillus sp. 2_A_57_CT2                                  | 319653145 | Sg9  | Guanine Deaminase         |
| Bacillus thuringiensis BMB171                            | 296502493 | Sg4  | 5'-dAdo/Ado Deaminase     |
| Bacillus thuringiensis HD-771                            | 402561058 | Sg4  | 5'-dAdo/Ado Deaminase     |
| Bacillus thuringiensis HD-789                            | 401873394 | Sg4  | 5'-dAdo/Ado Deaminase     |
| Bacillus thuringiensis IBL 200                           | 228907597 | Sg4  | 5'-dAdo/Ado Deaminase     |
| Bacillus thuringiensis IBL 4222                          | 228900482 | Sg4  | 5'-dAdo/Ado Deaminase     |
| Bacillus thuringiensis MC28                              | 407704282 | Sg4  | 5'-dAdo/Ado Deaminase     |
| Bacillus thuringiensis serovar andalousiensis BGSC 4AW1  | 228936987 | Sg4  | 5'-dAdo/Ado Deaminase     |
| Bacillus thuringiensis serovar berliner ATCC 10792       | 228939014 | Sg4  | 5'-dAdo/Ado Deaminase     |
| Bacillus thuringiensis serovar chinensis CT-43           | 384185807 | Sg4  | 5'-dAdo/Ado Deaminase     |
| Bacillus thuringiensis serovar finitimus YBT-020         | 384179851 | Sg4  | 5'-dAdo/Ado Deaminase     |
| Bacillus thuringiensis serovar huazhongensis BGSC 4BD1   | 228920608 | Sg4  | 5'-dAdo/Ado Deaminase     |
| Bacillus thuringiensis serovar konkukian str. 97-27      | 49477409  | Sg4  | 5'-dAdo/Ado Deaminase     |
| Bacillus thuringiensis serovar kurstaki str. T03a001     | 228952282 | Sg4  | 5'-dAdo/Ado Deaminase     |
| Bacillus thuringiensis serovar pakistani str. T13001     | 228958183 | Sg4  | 5'-dAdo/Ado Deaminase     |
| Bacillus thuringiensis serovar pondicheriensis BGSC 4BA1 | 228926904 | Sg4  | 5'-dAdo/Ado Deaminase     |
| Bacillus thuringiensis serovar pulsiensis BGSC 4CC1      | 228914493 | Sg4  | 5'-dAdo/Ado Deaminase     |
| Bacillus thuringiensis serovar sotto str. T04001         | 228964893 | Sg4  | 5'-dAdo/Ado Deaminase     |
| Bacillus thuringiensis serovar tochiensis BGSC 4Y1       | 228984996 | Sg4  | 5'-dAdo/Ado Deaminase     |
| Bacillus thuringiensis str. AI Hakam                     | 118477326 | Sg4  | 5'-dAdo/Ado Deaminase     |
| Bacillus weihenstephanensis KBAB4                        | 163939704 | Sg4  | 5'-dAdo/Ado Deaminase     |
| Beggiatoa alba B18LD                                     | 386827021 | Sg2  | MTA/5'-dAdo/Ado Deaminase |
| Beggiatoa sp. PS                                         | 153873847 | Sg2  | MTA/5'-dAdo/Ado Deaminase |
| Bermanella marisrubri                                    | 94499387  | Sg2  | MTA/5'-dAdo/Ado Deaminase |
| beta proteobacterium KB13                                | 254467827 | Sg2  | MTA/5'-dAdo/Ado Deaminase |
| Bilophila sp. 4_1_30                                     | 345889947 | Sg9  | Guanine Deaminase         |
| Bilophila wadsworthia 3_1_6                              | 317487162 | Sg9  | Guanine Deaminase         |
| Blastocystis hominis                                     | 300121918 | Sg2  | MTA/5'-dAdo/Ado Deaminase |
| Brevibacillus brevis NBRC 100599                         | 226310925 | Sg1a | SAH/MTA Deaminase         |
| Brevibacillus brevis NBRC 100599                         | 226312096 | Sg1a | SAH/MTA Deaminase         |
| Brevibacillus laterosporus GI-9                          | 372457910 | Sg1a | SAH/MTA Deaminase         |
| Brevibacillus laterosporus LMG 15441                     | 339010906 | Sg1a | SAH/MTA Deaminase         |
| Brevibacillus sp. BC25                                   | 398816055 | Sg1a | SAH/MTA Deaminase         |
| Brevibacillus sp. BC25                                   | 398816901 | Sg1a | SAH/MTA Deaminase         |
| Brevibacillus sp. CF112                                  | 399051035 | Sg1a | SAH/MTA Deaminase         |
| Brevibacillus sp. CF112                                  | 399053627 | Sg1a | SAH/MTA Deaminase         |
| Caldalkalibacillus thermarum TA2.A1                      | 335040522 | Sg4  | 5'-dAdo/Ado Deaminase     |
| Caldicellulosiruptor bescii DSM 6725                     | 222528885 | Sg1a | SAH/MTA Deaminase         |
| Caldicellulosiruptor hydrothermalis 108                  | 312128012 | Sg1a | SAH/MTA Deaminase         |
| Caldicellulosiruptor kristjanssonii 177R1B               | 312792882 | Sg1a | SAH/MTA Deaminase         |
| Caldicellulosiruptor kronotskyensis 2002                 | 312622825 | Sg1a | SAH/MTA Deaminase         |
| Caldicellulosiruptor lactoaceticus 6A                    | 344996935 | Sg1a | SAH/MTA Deaminase         |
| Caldicellulosiruptor obsidiansi OB47                     | 302871479 | Sg1a | SAH/MTA Deaminase         |
| Caldicellulosiruptor owensensis OL                       | 312134758 | Sg1a | SAH/MTA Deaminase         |
| Caldicellulosiruptor saccharolyticus DSM 8903            | 146296488 | Sg1a | SAH/MTA Deaminase         |
| Caldithrix abyssi DSM 13497                              | 373458019 | Sg7  | 5'-dAdo/Ado Deaminase     |
| Caldithrix abyssi DSM 13497                              | 373459944 | Sg9  | Guanine Deaminase         |
| Caloramator australicus RC3                              | 397905043 | Sg9  | Guanine Deaminase         |
| Candidatus Accumulibacter phosphatis clade IIA str. UW-1 | 257092705 | Sg2  | MTA/5'-dAdo/Ado Deaminase |
| Candidatus Chloracidobacterium thermophilum              | 157273296 | Sg9  | Guanine Deaminase         |
| Candidatus Chloracidobacterium thermophilum B            | 347755953 | Sg9  | Guanine Deaminase         |
| Candidatus Desulforudis audaxviator MP104C               | 169830835 | Sg1a | SAH/MTA Deaminase         |
| Candidatus Micrarchaeum acidiphilum ARMAN-2              | 255513470 | Sg11 | SAH Deaminase             |
| Carboxydotherrmus hydrogenoformans Z-2901                | 78042858  | Sg1a | SAH/MTA Deaminase         |
| Carboxydotherrmus hydrogenoformans Z-2901                | 78043497  | Sg9  | Guanine Deaminase         |
| Celeribacter baekdonensis B30                            | 407788291 | Sg10 | 8-Oxoadenine Deaminase    |
| Cellvibrio japonicus Ueda107                             | 192359201 | Sg2  | MTA/5'-dAdo/Ado Deaminase |
| Cellvibrio sp. BR                                        | 388257211 | Sg2  | MTA/5'-dAdo/Ado Deaminase |
| Chloroflexus aggregans DSM 9485                          | 219848329 | Sg7  | 5'-dAdo/Ado Deaminase     |
| Chloroflexus aurantiacus J-10-fl                         | 163847463 | Sg7  | 5'-dAdo/Ado Deaminase     |
| Chondromyces apiculatus DSM 436                          | 405354369 | Sg9  | Guanine Deaminase         |

|                                                                                |           |      |                           |
|--------------------------------------------------------------------------------|-----------|------|---------------------------|
| <i>Chromobacterium violaceum</i> ATCC 12472                                    | 34496487  | Sg2  | MTA/5'-dAdo/Ado Deaminase |
| <i>Clostridium cellulolyticum</i> H10                                          | 220929580 | Sg1a | SAH/MTA Deaminase         |
| <i>Clostridium clariflavum</i> DSM 19732                                       | 374297278 | Sg1a | SAH/MTA Deaminase         |
| <i>Clostridium papyrosolvens</i> DSM 2782                                      | 326204458 | Sg1a | SAH/MTA Deaminase         |
| <i>Clostridium</i> sp. BNL1100                                                 | 376261823 | Sg1a | SAH/MTA Deaminase         |
| <i>Clostridium thermocellum</i> ATCC 27405                                     | 125973714 | Sg1a | SAH/MTA Deaminase         |
| <i>Congregibacter litoralis</i> KT71                                           | 88705959  | Sg2  | MTA/5'-dAdo/Ado Deaminase |
| <i>Coralococcus coralloides</i> DSM 2259                                       | 383458147 | Sg9  | Guanine Deaminase         |
| <i>Coxiella burnetii</i> CbuG_Q212                                             | 212212982 | Sg2  | MTA/5'-dAdo/Ado Deaminase |
| <i>Coxiella burnetii</i> Dugway 5J108-111                                      | 209364106 | Sg2  | MTA/5'-dAdo/Ado Deaminase |
| <i>Coxiella burnetii</i> 'MSU Goat Q177'                                       | 153207936 | Sg2  | MTA/5'-dAdo/Ado Deaminase |
| <i>Cycloclasticus</i> sp. P1                                                   | 407716515 | Sg2  | MTA/5'-dAdo/Ado Deaminase |
| <i>Dechloromonas aromatica</i> RCB                                             | 71906868  | Sg2  | MTA/5'-dAdo/Ado Deaminase |
| <i>Dechlorosoma suillum</i> PS                                                 | 372488586 | Sg2  | MTA/5'-dAdo/Ado Deaminase |
| <i>Dehalobacter</i> sp. DCA                                                    | 410658783 | Sg1a | SAH/MTA Deaminase         |
| <i>Desulfotobacterium dehalogenans</i> ATCC 51507                              | 392394730 | Sg1a | SAH/MTA Deaminase         |
| <i>Desulfotobacterium hafniense</i> DCB-2                                      | 219669780 | Sg1a | SAH/MTA Deaminase         |
| <i>Desulfotobacterium hafniense</i> DP7                                        | 361854316 | Sg1a | SAH/MTA Deaminase         |
| <i>Desulfotobacterium hafniense</i> Y51                                        | 89895347  | Sg1a | SAH/MTA Deaminase         |
| <i>Desulfotobacterium metallireducens</i> DSM 15288                            | 354558628 | Sg1a | SAH/MTA Deaminase         |
| <i>Desulfosporosinus acidiphilus</i> SJ4                                       | 392426864 | Sg1a | SAH/MTA Deaminase         |
| <i>Desulfosporosinus acidiphilus</i> SJ4                                       | 392425377 | Sg9  | Guanine Deaminase         |
| <i>Desulfosporosinus meridiei</i> DSM 13257                                    | 402574100 | Sg1a | SAH/MTA Deaminase         |
| <i>Desulfosporosinus meridiei</i> DSM 13257                                    | 402571851 | Sg9  | Guanine Deaminase         |
| <i>Desulfosporosinus orientis</i> DSM 765                                      | 374997113 | Sg1a | SAH/MTA Deaminase         |
| <i>Desulfosporosinus orientis</i> DSM 765                                      | 374994062 | Sg9  | Guanine Deaminase         |
| <i>Desulfosporosinus</i> sp. OT                                                | 345859710 | Sg1a | SAH/MTA Deaminase         |
| <i>Desulfosporosinus</i> sp. OT                                                | 345856704 | Sg9  | Guanine Deaminase         |
| <i>Desulfosporosinus youngiae</i> DSM 17734                                    | 374582905 | Sg1a | SAH/MTA Deaminase         |
| <i>Desulfosporosinus youngiae</i> DSM 17734                                    | 374579958 | Sg9  | Guanine Deaminase         |
| <i>Desulfotomaculum acetoxidans</i> DSM 771                                    | 258514475 | Sg1a | SAH/MTA Deaminase         |
| <i>Desulfotomaculum gibsoniae</i> DSM 7213                                     | 357038764 | Sg1a | SAH/MTA Deaminase         |
| <i>Desulfotomaculum gibsoniae</i> DSM 7213                                     | 357038847 | Sg9  | Guanine Deaminase         |
| <i>Desulfotomaculum kuznetsovii</i> DSM 6115                                   | 333979669 | Sg1a | SAH/MTA Deaminase         |
| <i>Desulfotomaculum nigrificans</i> DSM 574                                    | 323702678 | Sg1a | SAH/MTA Deaminase         |
| <i>Desulfotomaculum reducens</i> MI-1                                          | 134299907 | Sg1a | SAH/MTA Deaminase         |
| <i>Desulfotomaculum ruminis</i> DSM 2154                                       | 334340360 | Sg1a | SAH/MTA Deaminase         |
| <i>Desulfovibrio aespoeensis</i> Aspo-2                                        | 317153206 | Sg6  | 5'-dAdo Deaminase         |
| <i>Desulfovibrio africanus</i> str. Walvis Bay                                 | 374301048 | Sg6  | 5'-dAdo Deaminase         |
| <i>Desulfovibrio alaskensis</i> G20                                            | 78356855  | Sg6  | 5'-dAdo Deaminase         |
| <i>Desulfovibrio desulfuricans</i> ND132                                       | 376295307 | Sg6  | 5'-dAdo Deaminase         |
| <i>Desulfovibrio desulfuricans</i> subsp. <i>desulfuricans</i> str. ATCC 27774 | 220905193 | Sg6  | 5'-dAdo Deaminase         |
| <i>Desulfovibrio fructosovorans</i> JJ                                         | 303247207 | Sg6  | 5'-dAdo Deaminase         |
| <i>Desulfovibrio magneticus</i> RS-1                                           | 239907238 | Sg6  | 5'-dAdo Deaminase         |
| <i>Desulfovibrio magneticus</i> str. Maddingley MBC34                          | 410462003 | Sg6  | 5'-dAdo Deaminase         |
| <i>Desulfovibrio piger</i> ATCC 29098                                          | 212702496 | Sg6  | 5'-dAdo Deaminase         |
| <i>Desulfovibrio salexigens</i> DSM 2638                                       | 242279072 | Sg6  | 5'-dAdo Deaminase         |
| <i>Desulfovibrio</i> sp. 3_1_syn3                                              | 303327872 | Sg6  | 5'-dAdo Deaminase         |
| <i>Desulfovibrio</i> sp. 6_1_46FAA                                             | 345893536 | Sg6  | 5'-dAdo Deaminase         |
| <i>Desulfovibrio</i> sp. A2                                                    | 347731243 | Sg6  | 5'-dAdo Deaminase         |
| <i>Desulfovibrio</i> sp. FW1012B                                               | 357632585 | Sg6  | 5'-dAdo Deaminase         |
| <i>Desulfovibrio</i> sp. U5L                                                   | 386392840 | Sg6  | 5'-dAdo Deaminase         |
| <i>Desulfovibrio vulgaris</i> DP4                                              | 120602380 | Sg6  | 5'-dAdo Deaminase         |
| <i>Desulfovibrio vulgaris</i> str. Hildenborough                               | 46580235  | Sg6  | 5'-dAdo Deaminase         |
| <i>Desulfovibrio vulgaris</i> str. 'Miyazaki F'                                | 218885652 | Sg6  | 5'-dAdo Deaminase         |
| <i>Dethiobacter alkaliphilus</i> AHT 1                                         | 225181018 | Sg1a | SAH/MTA Deaminase         |
| <i>Dialister microaerophilus</i> UPII 345-E                                    | 313891988 | Sg1a | SAH/MTA Deaminase         |
| <i>Dictyostelium discoideum</i> AX4                                            | 66808699  | Sg2  | MTA/5'-dAdo/Ado Deaminase |
| <i>Dictyostelium fasciculatum</i>                                              | 328876856 | Sg2  | MTA/5'-dAdo/Ado Deaminase |
| <i>Dictyostelium purpureum</i>                                                 | 330840449 | Sg2  | MTA/5'-dAdo/Ado Deaminase |
| <i>Ectothiorhodospira</i> sp. PHS-1                                            | 374622997 | Sg2  | MTA/5'-dAdo/Ado Deaminase |
| endosymbiont of <i>Tevnia jerichonana</i> (vent Tica)                          | 345863456 | Sg2  | MTA/5'-dAdo/Ado Deaminase |
| <i>Ferroglobus placidus</i> DSM 10642                                          | 288931156 | Sg1b | SAH/MTA/5'-dAdo Deaminase |
| <i>Ferroplasma acidarmanus</i> fer1                                            | 257076627 | Sg11 | SAH Deaminase             |
| <i>Fervidobacterium nodosum</i> Rt17-B1                                        | 154249043 | Sg8  | SAH/MTA Deaminase         |
| <i>Fervidobacterium pennivorans</i> DSM 9078                                   | 383786427 | Sg8  | SAH/MTA Deaminase         |

|                                       |           |      |                           |
|---------------------------------------|-----------|------|---------------------------|
| Filifactor alocis ATCC 35896          | 374307435 | Sg1a | SAH/MTA Deaminase         |
| Frankia sp. CN3                       | 358458993 | Sg10 | 8-Oxoadenine Deaminase    |
| Frankia sp. Eu1c                      | 312198398 | Sg10 | 8-Oxoadenine Deaminase    |
| Frateuria aurantia DSM 6220           | 383316999 | Sg2  | MTA/5'-dAdo/Ado Deaminase |
| gamma proteobacterium BDW918          | 386286357 | Sg2  | MTA/5'-dAdo/Ado Deaminase |
| gamma proteobacterium HIMB55          | 374619383 | Sg2  | MTA/5'-dAdo/Ado Deaminase |
| gamma proteobacterium HTCC2207        | 90416544  | Sg2  | MTA/5'-dAdo/Ado Deaminase |
| gamma proteobacterium HTCC5015        | 254447042 | Sg2  | MTA/5'-dAdo/Ado Deaminase |
| gamma proteobacterium IMCC1989        | 331005952 | Sg2  | MTA/5'-dAdo/Ado Deaminase |
| gamma proteobacterium IMCC3088        | 329894506 | Sg2  | MTA/5'-dAdo/Ado Deaminase |
| gamma proteobacterium NOR51-B         | 254281621 | Sg2  | MTA/5'-dAdo/Ado Deaminase |
| gamma proteobacterium NOR5-3          | 254515160 | Sg2  | MTA/5'-dAdo/Ado Deaminase |
| Glaciecola psychrophila 170           | 410612095 | Sg10 | 8-Oxoadenine Deaminase    |
| Hahella chejuensis KCTC 2396          | 83647052  | Sg2  | MTA/5'-dAdo/Ado Deaminase |
| Haladaptatus paucihalophilus DX253    | 322368161 | Sg1b | SAH/MTA/5'-dAdo Deaminase |
| Halalkalicoccus jeotgali B3           | 300709789 | Sg1b | SAH/MTA/5'-dAdo Deaminase |
| Halalkalicoccus jeotgali B3           | 300711133 | Sg9  | Guanine Deaminase         |
| Haloarcula hispanica ATCC 33960       | 344210262 | Sg9  | Guanine Deaminase         |
| Haloarcula marismortui ATCC 43049     | 55376787  | Sg9  | Guanine Deaminase         |
| Halobacterium sp. DL1                 | 354609692 | Sg1b | SAH/MTA/5'-dAdo Deaminase |
| Halobacterium sp. DL1                 | 354611609 | Sg9  | Guanine Deaminase         |
| Halobacterium sp. NRC-1               | 15791066  | Sg1b | SAH/MTA/5'-dAdo Deaminase |
| Halobacterium sp. NRC-1               | 15790271  | Sg9  | Guanine Deaminase         |
| Halobiforma lacticisalsi AJ5          | 383619876 | Sg1b | SAH/MTA/5'-dAdo Deaminase |
| Halobiforma lacticisalsi AJ5          | 383622348 | Sg9  | Guanine Deaminase         |
| Halococcus hamelinensis 100A6         | 409723629 | Sg1b | SAH/MTA/5'-dAdo Deaminase |
| Haloferax mediterranei ATCC 33500     | 389845656 | Sg1b | SAH/MTA/5'-dAdo Deaminase |
| Haloferax mediterranei ATCC 33500     | 389848339 | Sg9  | Guanine Deaminase         |
| Haloferax volcanii DS2                | 292654344 | Sg1b | SAH/MTA/5'-dAdo Deaminase |
| Haloferax volcanii DS2                | 292657041 | Sg9  | Guanine Deaminase         |
| Halogeometricum borinquense DSM 11551 | 313124800 | Sg1b | SAH/MTA/5'-dAdo Deaminase |
| Halogeometricum borinquense DSM 11551 | 313125853 | Sg9  | Guanine Deaminase         |
| Halogramum salarium B-1               | 399576134 | Sg1b | SAH/MTA/5'-dAdo Deaminase |
| Halogramum salarium B-1               | 399578642 | Sg9  | Guanine Deaminase         |
| Halomicrobium mukohataei DSM 12286    | 257386819 | Sg1b | SAH/MTA/5'-dAdo Deaminase |
| Halomicrobium mukohataei DSM 12286    | 257388127 | Sg9  | Guanine Deaminase         |
| halophilic archaeon DL31              | 345005326 | Sg1b | SAH/MTA/5'-dAdo Deaminase |
| halophilic archaeon DL31              | 345006111 | Sg1b | SAH/MTA/5'-dAdo Deaminase |
| halophilic archaeon DL31              | 345005185 | Sg9  | Guanine Deaminase         |
| Halopiger xanaduensis SH-6            | 336252669 | Sg1b | SAH/MTA/5'-dAdo Deaminase |
| Halopiger xanaduensis SH-6            | 336251757 | Sg9  | Guanine Deaminase         |
| Haloquadratum walsbyi C23             | 385804851 | Sg1b | SAH/MTA/5'-dAdo Deaminase |
| Haloquadratum walsbyi C23             | 385803442 | Sg9  | Guanine Deaminase         |
| Haloquadratum walsbyi DSM 16790       | 110669287 | Sg1b | SAH/MTA/5'-dAdo Deaminase |
| Haloquadratum walsbyi DSM 16790       | 110667994 | Sg9  | Guanine Deaminase         |
| Halorhabdus tiamatea SARL4B           | 335438625 | Sg1b | SAH/MTA/5'-dAdo Deaminase |
| Halorhabdus utahensis DSM 12940       | 257052590 | Sg1b | SAH/MTA/5'-dAdo Deaminase |
| Halorhodospira halophila SL1          | 121997375 | Sg2  | MTA/5'-dAdo/Ado Deaminase |
| Halorubrum lacusprofundi ATCC 49239   | 222478500 | Sg1b | SAH/MTA/5'-dAdo Deaminase |
| Halorubrum lacusprofundi ATCC 49239   | 222480611 | Sg9  | Guanine Deaminase         |
| Haloterrigena turkmenica DSM 5511     | 284163440 | Sg1b | SAH/MTA/5'-dAdo Deaminase |
| Haloterrigena turkmenica DSM 5511     | 284167168 | Sg9  | Guanine Deaminase         |
| Heliobacterium modesticaldum Ice1     | 167630246 | Sg1a | SAH/MTA Deaminase         |
| Heliobacterium modesticaldum Ice1     | 167630730 | Sg9  | Guanine Deaminase         |
| Herpetosiphon aurantiacus DSM 785     | 159901377 | Sg7  | 5'-dAdo/Ado Deaminase     |
| Hydrocarboniphaga effusa AP103        | 392954008 | Sg2  | MTA/5'-dAdo/Ado Deaminase |
| Ignavibacterium album JCM 16511       | 385810930 | Sg9  | Guanine Deaminase         |
| Janthinobacterium sp. Marseille       | 152980942 | Sg10 | 8-Oxoadenine Deaminase    |
| Kangiella koreensis DSM 16069         | 256822116 | Sg2  | MTA/5'-dAdo/Ado Deaminase |
| Kyrpidia tusciae DSM 2912             | 295696295 | Sg1a | SAH/MTA Deaminase         |
| Kyrpidia tusciae DSM 2912             | 295696613 | Sg9  | Guanine Deaminase         |
| Laribacter hongkongensis HLHK9        | 226939880 | Sg2  | MTA/5'-dAdo/Ado Deaminase |
| Lawsonia intracellularis PHE/MN1-00   | 94986921  | Sg6  | 5'-dAdo Deaminase         |
| Lawsonia intracellularis PHE/MN1-00   | 162416190 | Sg6  | 5'-dAdo Deaminase         |
| Limnobacter sp. MED105                | 149928285 | Sg2  | MTA/5'-dAdo/Ado Deaminase |
| Mahella australiensis 50-1 BON        | 332980925 | Sg1a | SAH/MTA Deaminase         |

|                                                     |           |      |                           |
|-----------------------------------------------------|-----------|------|---------------------------|
| Marichromatium purpuratum 984                       | 344342370 | Sg2  | MTA/5'-dAdo/Ado Deaminase |
| marine gamma proteobacterium HTCC2080               | 119505050 | Sg2  | MTA/5'-dAdo/Ado Deaminase |
| marine gamma proteobacterium HTCC2143               | 119476908 | Sg2  | MTA/5'-dAdo/Ado Deaminase |
| marine gamma proteobacterium HTCC2148               | 254481817 | Sg2  | MTA/5'-dAdo/Ado Deaminase |
| Marinobacter adhaerens HP15                         | 385330969 | Sg2  | MTA/5'-dAdo/Ado Deaminase |
| Marinobacter algicola DG893                         | 149374309 | Sg2  | MTA/5'-dAdo/Ado Deaminase |
| Marinobacter aquaeolei VT8                          | 120555405 | Sg2  | MTA/5'-dAdo/Ado Deaminase |
| Marinobacter hydrocarbonoclasticus ATCC 49840       | 387814819 | Sg2  | MTA/5'-dAdo/Ado Deaminase |
| Marinobacter manganooxydans Mnl7-9                  | 358448853 | Sg2  | MTA/5'-dAdo/Ado Deaminase |
| Marinobacter sp. BSs20148                           | 399544435 | Sg2  | MTA/5'-dAdo/Ado Deaminase |
| Marinobacter sp. ELB17                              | 126665969 | Sg2  | MTA/5'-dAdo/Ado Deaminase |
| Marinomonas sp. MED121                              | 87119283  | Sg2  | MTA/5'-dAdo/Ado Deaminase |
| Megamonas hypermegale ART12/1                       | 291533823 | Sg1a | SAH/MTA Deaminase         |
| Megasphaera elsdenii DSM 20460                      | 348026976 | Sg1a | SAH/MTA Deaminase         |
| Megasphaera genomsp. type_1 str. 28L                | 290968533 | Sg1a | SAH/MTA Deaminase         |
| Megasphaera sp. UPII 135-E                          | 342218412 | Sg1a | SAH/MTA Deaminase         |
| Methanobacterium formicicum DSM 3637                | 408381208 | Sg1b | SAH/MTA/5'-dAdo Deaminase |
| Methanobacterium sp. AL-21                          | 325957773 | Sg1b | SAH/MTA/5'-dAdo Deaminase |
| Methanobacterium sp. Maddingley MBC34               | 410720785 | Sg1b | SAH/MTA/5'-dAdo Deaminase |
| Methanobacterium sp. SWAN-1                         | 333986326 | Sg1b | SAH/MTA/5'-dAdo Deaminase |
| Methanobrevibacter ruminantium M1                   | 288559345 | Sg1b | SAH/MTA/5'-dAdo Deaminase |
| Methanobrevibacter smithii ATCC 35061               | 148643319 | Sg1b | SAH/MTA/5'-dAdo Deaminase |
| Methanobrevibacter smithii DSM 2375                 | 222445560 | Sg1b | SAH/MTA/5'-dAdo Deaminase |
| Methanocaldococcus fervens AG86                     | 256811411 | Sg1b | SAH/MTA/5'-dAdo Deaminase |
| Methanocaldococcus infernus ME                      | 296109783 | Sg1b | SAH/MTA/5'-dAdo Deaminase |
| Methanocaldococcus jannaschii DSM 2661              | 15669736  | Sg1b | SAH/MTA/5'-dAdo Deaminase |
| Methanocaldococcus sp. FS406-22                     | 289192226 | Sg1b | SAH/MTA/5'-dAdo Deaminase |
| Methanocaldococcus vulcanius M7                     | 261402768 | Sg1b | SAH/MTA/5'-dAdo Deaminase |
| Methanococcoides burtonii DSM 6242                  | 91773163  | Sg1b | SAH/MTA/5'-dAdo Deaminase |
| Methanococcus aeolicus Nankai-3                     | 150400987 | Sg1b | SAH/MTA/5'-dAdo Deaminase |
| Methanococcus maripaludis C5                        | 134045132 | Sg1b | SAH/MTA/5'-dAdo Deaminase |
| Methanococcus maripaludis C6                        | 159905566 | Sg1b | SAH/MTA/5'-dAdo Deaminase |
| Methanococcus maripaludis C7                        | 150402659 | Sg1b | SAH/MTA/5'-dAdo Deaminase |
| Methanococcus maripaludis S2                        | 45359054  | Sg1b | SAH/MTA/5'-dAdo Deaminase |
| Methanococcus maripaludis X1                        | 340624802 | Sg1b | SAH/MTA/5'-dAdo Deaminase |
| Methanococcus vannielii SB                          | 150399551 | Sg1b | SAH/MTA/5'-dAdo Deaminase |
| Methanocorpusculum labreanum Z                      | 124485874 | Sg1b | SAH/MTA/5'-dAdo Deaminase |
| Methanoculleus bourgensis MS2                       | 397780245 | Sg1b | SAH/MTA/5'-dAdo Deaminase |
| Methanoculleus marisnigri JR1                       | 126179037 | Sg1b | SAH/MTA/5'-dAdo Deaminase |
| Methanofollis liminatans DSM 4140                   | 395646173 | Sg1b | SAH/MTA/5'-dAdo Deaminase |
| Methanohalobium evestigatum Z-7303                  | 298674732 | Sg1b | SAH/MTA/5'-dAdo Deaminase |
| Methanohalobium evestigatum Z-7303                  | 298674749 | Sg1b | SAH/MTA/5'-dAdo Deaminase |
| Methanohalophilus mahii DSM 5219                    | 294495200 | Sg1b | SAH/MTA/5'-dAdo Deaminase |
| Methanolinea tarda NOBI-1                           | 355571893 | Sg1b | SAH/MTA/5'-dAdo Deaminase |
| Methanolobus psychrophilus R15                      | 410670209 | Sg1b | SAH/MTA/5'-dAdo Deaminase |
| Methanoplanus limicola DSM 2279                     | 374628529 | Sg1b | SAH/MTA/5'-dAdo Deaminase |
| Methanoplanus petrolearius DSM 11571                | 307352986 | Sg1b | SAH/MTA/5'-dAdo Deaminase |
| Methanoregula boonei 6A8                            | 154150311 | Sg1b | SAH/MTA/5'-dAdo Deaminase |
| Methanosalsum zhilinae DSM 4017                     | 336476448 | Sg1b | SAH/MTA/5'-dAdo Deaminase |
| Methanosarcina acetivorans C2A                      | 20090140  | Sg1b | SAH/MTA/5'-dAdo Deaminase |
| Methanosarcina acetivorans C2A                      | 162416231 | Sg1b | SAH/MTA/5'-dAdo Deaminase |
| Methanosarcina barkeri str. Fusaro                  | 73670698  | Sg1b | SAH/MTA/5'-dAdo Deaminase |
| Methanosarcina mazei Go1                            | 21228381  | Sg1b | SAH/MTA/5'-dAdo Deaminase |
| Methanosarcina mazei Go1                            | 162416232 | Sg1b | SAH/MTA/5'-dAdo Deaminase |
| Methanosphaera stadtmanae DSM 3091                  | 84489028  | Sg1b | SAH/MTA/5'-dAdo Deaminase |
| Methanosphaerula palustris E1-9c                    | 219851668 | Sg1b | SAH/MTA/5'-dAdo Deaminase |
| Methanospirillum hungatei JF-1                      | 88603687  | Sg1b | SAH/MTA/5'-dAdo Deaminase |
| Methanothermobacter marburgensis str. Marburg       | 304313866 | Sg1b | SAH/MTA/5'-dAdo Deaminase |
| Methanothermobacter thermautotrophicus str. Delta H | 15679502  | Sg1b | SAH/MTA/5'-dAdo Deaminase |
| Methanothermococcus okinawensis IH1                 | 336121909 | Sg1b | SAH/MTA/5'-dAdo Deaminase |
| Methanothermus fervidus DSM 2088                    | 312136929 | Sg1b | SAH/MTA/5'-dAdo Deaminase |
| Methanoterris formicicus Mc-S-70                    | 374635036 | Sg1b | SAH/MTA/5'-dAdo Deaminase |
| Methanoterris igneus Kol 5                          | 333910056 | Sg1b | SAH/MTA/5'-dAdo Deaminase |
| Methylobacillus flagellatus KT                      | 91775930  | Sg2  | MTA/5'-dAdo/Ado Deaminase |
| Methylobacter tundripaludum SV96                    | 344943153 | Sg2  | MTA/5'-dAdo/Ado Deaminase |
| Methylococcus capsulatus str. Bath                  | 53804375  | Sg2  | MTA/5'-dAdo/Ado Deaminase |

|                                             |           |      |                           |
|---------------------------------------------|-----------|------|---------------------------|
| Methylomicrobium album BG8                  | 381151397 | Sg2  | MTA/5'-dAdo/Ado Deaminase |
| Methylomicrobium alcaliphilum 20Z           | 357404855 | Sg2  | MTA/5'-dAdo/Ado Deaminase |
| Methylomonas methanica MC09                 | 333983431 | Sg2  | MTA/5'-dAdo/Ado Deaminase |
| Methylophaga aminisulfivorans MP            | 335043680 | Sg2  | MTA/5'-dAdo/Ado Deaminase |
| Methylophaga sp. JAM1                       | 387126837 | Sg2  | MTA/5'-dAdo/Ado Deaminase |
| Methylophaga sp. JAM7                       | 387129950 | Sg2  | MTA/5'-dAdo/Ado Deaminase |
| Methylophaga thiooxidans DMS010             | 254492160 | Sg2  | MTA/5'-dAdo/Ado Deaminase |
| Methylophilales bacterium HTCC2181          | 118594964 | Sg2  | MTA/5'-dAdo/Ado Deaminase |
| Methylotenera mobilis JLW8                  | 253996273 | Sg2  | MTA/5'-dAdo/Ado Deaminase |
| Methylotenera versatilis 301                | 297538147 | Sg2  | MTA/5'-dAdo/Ado Deaminase |
| Methyloversatilis universalis FAM5          | 334131892 | Sg2  | MTA/5'-dAdo/Ado Deaminase |
| Methylovorus glucosetrophus SIP3-4          | 253999389 | Sg2  | MTA/5'-dAdo/Ado Deaminase |
| Methylovorus sp. MP688                      | 313201411 | Sg2  | MTA/5'-dAdo/Ado Deaminase |
| Moorella thermoacetica ATCC 39073           | 83590072  | Sg9  | Guanine Deaminase         |
| Myxococcus fulvus HW-1                      | 338536821 | Sg9  | Guanine Deaminase         |
| Myxococcus xanthus DK 1622                  | 108760686 | Sg9  | Guanine Deaminase         |
| Natranaerobius thermophilus JW/NM-WN-LF     | 188586216 | Sg1a | SAH/MTA Deaminase         |
| Natranaerobius thermophilus JW/NM-WN-LF     | 188585774 | Sg9  | Guanine Deaminase         |
| Natrialba magadii ATCC 43099                | 289581520 | Sg1b | SAH/MTA/5'-dAdo Deaminase |
| Natrialba magadii ATCC 43099                | 289582777 | Sg9  | Guanine Deaminase         |
| Natrinema sp. J7-2                          | 397772383 | Sg1b | SAH/MTA/5'-dAdo Deaminase |
| Natrinema sp. J7-2                          | 397775256 | Sg9  | Guanine Deaminase         |
| Natronomonas pharaonis DSM 2160             | 76801137  | Sg1b | SAH/MTA/5'-dAdo Deaminase |
| Nitrococcus mobilis Nb-231                  | 88810641  | Sg2  | MTA/5'-dAdo/Ado Deaminase |
| Nitrosococcus halophilus Nc4                | 292492450 | Sg2  | MTA/5'-dAdo/Ado Deaminase |
| Nitrosococcus oceani ATCC 19707             | 77165758  | Sg2  | MTA/5'-dAdo/Ado Deaminase |
| Nitrosococcus watsonii C-113                | 300114707 | Sg2  | MTA/5'-dAdo/Ado Deaminase |
| Nitrosomonas sp. AL212                      | 325982084 | Sg2  | MTA/5'-dAdo/Ado Deaminase |
| Nitrosomonas sp. Is79A3                     | 339484010 | Sg2  | MTA/5'-dAdo/Ado Deaminase |
| Nitrosospira multiformis ATCC 25196         | 82703305  | Sg2  | MTA/5'-dAdo/Ado Deaminase |
| Oscillochloris trichoides DG-6              | 309790136 | Sg7  | 5'-dAdo/Ado Deaminase     |
| Paenibacillus alvei DSM 29                  | 402815300 | Sg1a | SAH/MTA Deaminase         |
| Paenibacillus curdolanolyticus YK9          | 304406901 | Sg1a | SAH/MTA Deaminase         |
| Paenibacillus curdolanolyticus YK9          | 304407468 | Sg9  | Guanine Deaminase         |
| Paenibacillus dendritiformis C454           | 374606202 | Sg1a | SAH/MTA Deaminase         |
| Paenibacillus dendritiformis C454           | 374606828 | Sg1a | SAH/MTA Deaminase         |
| Paenibacillus elgii B69                     | 357014314 | Sg1a | SAH/MTA Deaminase         |
| Paenibacillus lactis 154                    | 354582691 | Sg1a | SAH/MTA Deaminase         |
| Paenibacillus mucilaginosus 3016            | 379720955 | Sg1a | SAH/MTA Deaminase         |
| Paenibacillus mucilaginosus K02             | 386721945 | Sg9  | Guanine Deaminase         |
| Paenibacillus mucilaginosus KNP414          | 337747099 | Sg1a | SAH/MTA Deaminase         |
| Paenibacillus mucilaginosus KNP414          | 337745352 | Sg9  | Guanine Deaminase         |
| Paenibacillus peoriae KCTC 3763             | 390453515 | Sg1a | SAH/MTA Deaminase         |
| Paenibacillus polymyxa E681                 | 308069468 | Sg1a | SAH/MTA Deaminase         |
| Paenibacillus polymyxa SC2                  | 310642521 | Sg1a | SAH/MTA Deaminase         |
| Paenibacillus popilliae ATCC 14706          | 410831044 | Sg1a | SAH/MTA Deaminase         |
| Paenibacillus sp. Aloe-11                   | 375308996 | Sg1a | SAH/MTA Deaminase         |
| Paenibacillus sp. HGF5                      | 329929741 | Sg1a | SAH/MTA Deaminase         |
| Paenibacillus sp. HGF7                      | 334137813 | Sg1a | SAH/MTA Deaminase         |
| Paenibacillus sp. HGF7                      | 334133556 | Sg4  | 5'-dAdo/Ado Deaminase     |
| Paenibacillus sp. JDR-2                     | 251796461 | Sg1a | SAH/MTA Deaminase         |
| Paenibacillus sp. JDR-2                     | 251797317 | Sg9  | Guanine Deaminase         |
| Paenibacillus sp. oral taxon 786 str. D14   | 253577521 | Sg1a | SAH/MTA Deaminase         |
| Paenibacillus sp. Y412MC10                  | 261406089 | Sg1a | SAH/MTA Deaminase         |
| Paenibacillus terrae HPL-003                | 374324456 | Sg1a | SAH/MTA Deaminase         |
| Paenibacillus terrae HPL-003                | 374324681 | Sg1a | SAH/MTA Deaminase         |
| Paenibacillus vortex V453                   | 315646469 | Sg1a | SAH/MTA Deaminase         |
| Pelosinus fermentans DSM 17108              | 392960171 | Sg1a | SAH/MTA Deaminase         |
| Pelosinus fermentans DSM 17108              | 392960651 | Sg1a | SAH/MTA Deaminase         |
| Pelosinus fermentans JBW45                  | 392525916 | Sg1a | SAH/MTA Deaminase         |
| Pelotomaculum thermopropionicum SI          | 147678063 | Sg1a | SAH/MTA Deaminase         |
| Peptoniphilus harei ACS-146-V-Sch2b         | 313888086 | Sg1a | SAH/MTA Deaminase         |
| Peptoniphilus lacrimalis 315-B              | 282883342 | Sg1a | SAH/MTA Deaminase         |
| Peptoniphilus rhinitidis 1-13               | 399924014 | Sg1a | SAH/MTA Deaminase         |
| Peptoniphilus sp. oral taxon 375 str. F0436 | 342215639 | Sg1a | SAH/MTA Deaminase         |
| Peptoniphilus sp. oral taxon 386 str. F0131 | 299144487 | Sg1a | SAH/MTA Deaminase         |



|                                                         |           |      |                           |
|---------------------------------------------------------|-----------|------|---------------------------|
| Peptoniphilus sp. oral taxon 836 str. F0141             | 300814796 | Sg1a | SAH/MTA Deaminase         |
| Phytophthora infestans T30-4                            | 301110462 | Sg2  | MTA/5'-dAdo/Ado Deaminase |
| Phytophthora infestans T30-4                            | 301117868 | Sg2  | MTA/5'-dAdo/Ado Deaminase |
| Phytophthora sojae                                      | 348667430 | Sg2  | MTA/5'-dAdo/Ado Deaminase |
| Phytophthora sojae                                      | 348688636 | Sg2  | MTA/5'-dAdo/Ado Deaminase |
| Picrophilus torridus DSM 9790                           | 48477797  | Sg11 | SAH Deaminase             |
| Polysphondylium pallidum PN500                          | 281202610 | Sg2  | MTA/5'-dAdo/Ado Deaminase |
| Porphyromonas asaccharolytica DSM 20707                 | 332299943 | Sg1b | SAH/MTA/5'-dAdo Deaminase |
| Porphyromonas asaccharolytica PR426713P-I               | 313887254 | Sg1b | SAH/MTA/5'-dAdo Deaminase |
| Porphyromonas endodontalis ATCC 35406                   | 229495478 | Sg1b | SAH/MTA/5'-dAdo Deaminase |
| Porphyromonas sp. oral taxon 279 str. F0450             | 402846236 | Sg1b | SAH/MTA/5'-dAdo Deaminase |
| Porphyromonas uenonis 60-3                              | 228470332 | Sg1b | SAH/MTA/5'-dAdo Deaminase |
| Pseudogulbenkiania ferrooxidans 2002                    | 224824519 | Sg2  | MTA/5'-dAdo/Ado Deaminase |
| Pseudogulbenkiania sp. NH8B                             | 347538759 | Sg2  | MTA/5'-dAdo/Ado Deaminase |
| Pseudomonas aeruginosa 138244                           | 334835211 | Sg2  | MTA/5'-dAdo/Ado Deaminase |
| Pseudomonas aeruginosa ATCC 700888                      | 404537409 | Sg2  | MTA/5'-dAdo/Ado Deaminase |
| Pseudomonas aeruginosa M18                              | 386057869 | Sg2  | MTA/5'-dAdo/Ado Deaminase |
| Pseudomonas aeruginosa PA7                              | 152983730 | Sg2  | MTA/5'-dAdo/Ado Deaminase |
| Pseudomonas aeruginosa PACS2                            | 107102700 | Sg2  | MTA/5'-dAdo/Ado Deaminase |
| Pseudomonas aeruginosa PAO1                             | 15598366  | Sg2  | MTA/5'-dAdo/Ado Deaminase |
| Pseudomonas aeruginosa UCBPP-PA14                       | 116051159 | Sg2  | MTA/5'-dAdo/Ado Deaminase |
| Pseudomonas avellanae BPIC 631                          | 407990790 | Sg2  | MTA/5'-dAdo/Ado Deaminase |
| Pseudomonas brassicacearum subsp. brassicacearum NFM421 | 330808285 | Sg2  | MTA/5'-dAdo/Ado Deaminase |
| Pseudomonas chlororaphis O6                             | 389680971 | Sg2  | MTA/5'-dAdo/Ado Deaminase |
| Pseudomonas chlororaphis subsp. aureofaciens 30-84      | 397883504 | Sg2  | MTA/5'-dAdo/Ado Deaminase |
| Pseudomonas entomophila L48                             | 104780666 | Sg2  | MTA/5'-dAdo/Ado Deaminase |
| Pseudomonas extremaustralis 14-3 substr. 14-3b          | 395651183 | Sg2  | MTA/5'-dAdo/Ado Deaminase |
| Pseudomonas fluorescens A506                            | 387892902 | Sg2  | MTA/5'-dAdo/Ado Deaminase |
| Pseudomonas fluorescens F113                            | 378949565 | Sg2  | MTA/5'-dAdo/Ado Deaminase |
| Pseudomonas fluorescens Pf0-1                           | 77460301  | Sg2  | MTA/5'-dAdo/Ado Deaminase |
| Pseudomonas fluorescens Q2-87                           | 397889241 | Sg2  | MTA/5'-dAdo/Ado Deaminase |
| Pseudomonas fluorescens R124                            | 404305413 | Sg2  | MTA/5'-dAdo/Ado Deaminase |
| Pseudomonas fluorescens SBW25                           | 229589162 | Sg2  | MTA/5'-dAdo/Ado Deaminase |
| Pseudomonas fluorescens SS101                           | 387997677 | Sg2  | MTA/5'-dAdo/Ado Deaminase |
| Pseudomonas fluorescens WH6                             | 312959696 | Sg2  | MTA/5'-dAdo/Ado Deaminase |
| Pseudomonas fragi A22                                   | 402699915 | Sg2  | MTA/5'-dAdo/Ado Deaminase |
| Pseudomonas fulva 12-X                                  | 333900206 | Sg2  | MTA/5'-dAdo/Ado Deaminase |
| Pseudomonas fuscovaginae UPB0736                        | 404401721 | Sg2  | MTA/5'-dAdo/Ado Deaminase |
| Pseudomonas geniculata N1                               | 408825073 | Sg2  | MTA/5'-dAdo/Ado Deaminase |
| Pseudomonas mandelii JR-1                               | 407365600 | Sg2  | MTA/5'-dAdo/Ado Deaminase |
| Pseudomonas mendocina DLHK                              | 400345472 | Sg2  | MTA/5'-dAdo/Ado Deaminase |
| Pseudomonas mendocina NK-01                             | 330502866 | Sg2  | MTA/5'-dAdo/Ado Deaminase |
| Pseudomonas mendocina ymp                               | 146306877 | Sg2  | MTA/5'-dAdo/Ado Deaminase |
| Pseudomonas protegens Pf-5                              | 70731666  | Sg2  | MTA/5'-dAdo/Ado Deaminase |
| Pseudomonas pseudoalcaligenes CECT 5344                 | 399520031 | Sg2  | MTA/5'-dAdo/Ado Deaminase |
| Pseudomonas psychrotolerans L19                         | 359781487 | Sg2  | MTA/5'-dAdo/Ado Deaminase |
| Pseudomonas putida W619                                 | 170722310 | Sg10 | 8-Oxoadenine Deaminase    |
| Pseudomonas sp. Ag1                                     | 395798591 | Sg2  | MTA/5'-dAdo/Ado Deaminase |
| Pseudomonas sp. Chol1                                   | 409393717 | Sg2  | MTA/5'-dAdo/Ado Deaminase |
| Pseudomonas sp. GM102                                   | 398839969 | Sg2  | MTA/5'-dAdo/Ado Deaminase |
| Pseudomonas sp. GM17                                    | 399010547 | Sg2  | MTA/5'-dAdo/Ado Deaminase |
| Pseudomonas sp. GM18                                    | 399002584 | Sg2  | MTA/5'-dAdo/Ado Deaminase |
| Pseudomonas sp. GM21                                    | 398995407 | Sg2  | MTA/5'-dAdo/Ado Deaminase |
| Pseudomonas sp. GM24                                    | 398989436 | Sg2  | MTA/5'-dAdo/Ado Deaminase |
| Pseudomonas sp. GM25                                    | 398973358 | Sg2  | MTA/5'-dAdo/Ado Deaminase |
| Pseudomonas sp. GM30                                    | 398964531 | Sg2  | MTA/5'-dAdo/Ado Deaminase |
| Pseudomonas sp. GM33                                    | 398952126 | Sg2  | MTA/5'-dAdo/Ado Deaminase |
| Pseudomonas sp. GM41(2012)                              | 398938561 | Sg2  | MTA/5'-dAdo/Ado Deaminase |
| Pseudomonas sp. GM49                                    | 398917336 | Sg2  | MTA/5'-dAdo/Ado Deaminase |
| Pseudomonas sp. GM50                                    | 398899111 | Sg2  | MTA/5'-dAdo/Ado Deaminase |
| Pseudomonas sp. GM55                                    | 398890629 | Sg2  | MTA/5'-dAdo/Ado Deaminase |
| Pseudomonas sp. GM60                                    | 398885429 | Sg2  | MTA/5'-dAdo/Ado Deaminase |
| Pseudomonas sp. GM67                                    | 398879366 | Sg2  | MTA/5'-dAdo/Ado Deaminase |
| Pseudomonas sp. GM74                                    | 398871471 | Sg2  | MTA/5'-dAdo/Ado Deaminase |
| Pseudomonas sp. GM78                                    | 398868653 | Sg2  | MTA/5'-dAdo/Ado Deaminase |
| Pseudomonas sp. GM79                                    | 398859092 | Sg2  | MTA/5'-dAdo/Ado Deaminase |

|                                                           |           |      |                           |
|-----------------------------------------------------------|-----------|------|---------------------------|
| <i>Pseudomonas</i> sp. GM80                               | 398850871 | Sg2  | MTA/5'-dAdo/Ado Deaminase |
| <i>Pseudomonas</i> sp. GM84                               | 398843691 | Sg10 | 8-Oxoadenine Deaminase    |
| <i>Pseudomonas</i> sp. HYS                                | 409426090 | Sg2  | MTA/5'-dAdo/Ado Deaminase |
| <i>Pseudomonas</i> sp. M47T1                              | 388545952 | Sg2  | MTA/5'-dAdo/Ado Deaminase |
| <i>Pseudomonas</i> sp. PAMC 25886                         | 395499790 | Sg2  | MTA/5'-dAdo/Ado Deaminase |
| <i>Pseudomonas</i> sp. R81                                | 408482975 | Sg2  | MTA/5'-dAdo/Ado Deaminase |
| <i>Pseudomonas</i> sp. S9                                 | 374702041 | Sg2  | MTA/5'-dAdo/Ado Deaminase |
| <i>Pseudomonas</i> stutzeri A1501                         | 146282666 | Sg2  | MTA/5'-dAdo/Ado Deaminase |
| <i>Pseudomonas</i> stutzeri ATCC 14405 = CCUG 16156       | 379064775 | Sg2  | MTA/5'-dAdo/Ado Deaminase |
| <i>Pseudomonas</i> stutzeri ATCC 17588 = LMG 11199        | 339494279 | Sg2  | MTA/5'-dAdo/Ado Deaminase |
| <i>Pseudomonas</i> stutzeri CCUG 29243                    | 392421516 | Sg2  | MTA/5'-dAdo/Ado Deaminase |
| <i>Pseudomonas</i> stutzeri DSM 10701                     | 397687516 | Sg2  | MTA/5'-dAdo/Ado Deaminase |
| <i>Pseudomonas</i> stutzeri DSM 4166                      | 386020950 | Sg2  | MTA/5'-dAdo/Ado Deaminase |
| <i>Pseudomonas</i> stutzeri KOS6                          | 409778759 | Sg2  | MTA/5'-dAdo/Ado Deaminase |
| <i>Pseudomonas</i> stutzeri TS44                          | 387967423 | Sg2  | MTA/5'-dAdo/Ado Deaminase |
| <i>Pseudomonas</i> synxantha BG33R                        | 388470050 | Sg2  | MTA/5'-dAdo/Ado Deaminase |
| <i>Pseudomonas</i> syringae Cit 7                         | 330953526 | Sg2  | MTA/5'-dAdo/Ado Deaminase |
| <i>Pseudomonas</i> syringae pv. aceris str. M302273       | 330972347 | Sg2  | MTA/5'-dAdo/Ado Deaminase |
| <i>Pseudomonas</i> syringae pv. actinidiae str. M302091   | 330964795 | Sg2  | MTA/5'-dAdo/Ado Deaminase |
| <i>Pseudomonas</i> syringae pv. aesculi str. NCPPB 3681   | 289623729 | Sg2  | MTA/5'-dAdo/Ado Deaminase |
| <i>Pseudomonas</i> syringae pv. aptata str. DSM 50252     | 330980274 | Sg2  | MTA/5'-dAdo/Ado Deaminase |
| <i>Pseudomonas</i> syringae pv. avellanae str. ISPaVe013  | 407996526 | Sg2  | MTA/5'-dAdo/Ado Deaminase |
| <i>Pseudomonas</i> syringae pv. avellanae str. ISPaVe037  | 407996413 | Sg2  | MTA/5'-dAdo/Ado Deaminase |
| <i>Pseudomonas</i> syringae pv. glycinea str. B076        | 320323354 | Sg2  | MTA/5'-dAdo/Ado Deaminase |
| <i>Pseudomonas</i> syringae pv. lachrymans str. M301315   | 330986668 | Sg2  | MTA/5'-dAdo/Ado Deaminase |
| <i>Pseudomonas</i> syringae pv. maculicola str. ES4326    | 330960548 | Sg2  | MTA/5'-dAdo/Ado Deaminase |
| <i>Pseudomonas</i> syringae pv. mori str. 301020          | 330889349 | Sg2  | MTA/5'-dAdo/Ado Deaminase |
| <i>Pseudomonas</i> syringae pv. morsprunorum str. M302280 | 330877043 | Sg2  | MTA/5'-dAdo/Ado Deaminase |
| <i>Pseudomonas</i> syringae pv. phaseolicola 1448A        | 71733895  | Sg2  | MTA/5'-dAdo/Ado Deaminase |
| <i>Pseudomonas</i> syringae pv. syringae 642              | 302187663 | Sg2  | MTA/5'-dAdo/Ado Deaminase |
| <i>Pseudomonas</i> syringae pv. syringae B728a            | 66046878  | Sg2  | MTA/5'-dAdo/Ado Deaminase |
| <i>Pseudomonas</i> syringae pv. tabaci str. ATCC 11528    | 257485851 | Sg2  | MTA/5'-dAdo/Ado Deaminase |
| <i>Pseudomonas</i> syringae pv. tomato str. DC3000        | 28868949  | Sg2  | MTA/5'-dAdo/Ado Deaminase |
| <i>Pseudomonas</i> viridiflava UASWS0038                  | 410092253 | Sg2  | MTA/5'-dAdo/Ado Deaminase |
| <i>Pseudoxanthomonas</i> spadix BD-a59                    | 357417314 | Sg2  | MTA/5'-dAdo/Ado Deaminase |
| <i>Pseudoxanthomonas</i> suwonensis 11-1                  | 319786813 | Sg2  | MTA/5'-dAdo/Ado Deaminase |
| <i>Pyrococcus</i> abyssi GE5                              | 14520861  | Sg1b | SAH/MTA/5'-dAdo Deaminase |
| <i>Pyrococcus</i> furiosus DSM 3638                       | 18977910  | Sg1b | SAH/MTA/5'-dAdo Deaminase |
| <i>Pyrococcus</i> horikoshii OT3                          | 14591297  | Sg1b | SAH/MTA/5'-dAdo Deaminase |
| <i>Pyrococcus</i> horikoshii OT3                          | 161789036 | Sg1b | SAH/MTA/5'-dAdo Deaminase |
| <i>Pyrococcus</i> sp. NA2                                 | 332157744 | Sg1b | SAH/MTA/5'-dAdo Deaminase |
| <i>Pyrococcus</i> sp. ST04                                | 389852822 | Sg1b | SAH/MTA/5'-dAdo Deaminase |
| <i>Pyrococcus</i> yayanosii CH1                           | 337284243 | Sg1b | SAH/MTA/5'-dAdo Deaminase |
| <i>Reinekea</i> blandensis MED297                         | 88800757  | Sg2  | MTA/5'-dAdo/Ado Deaminase |
| <i>Rhodanobacter</i> fulvus Jip2                          | 389793007 | Sg2  | MTA/5'-dAdo/Ado Deaminase |
| <i>Rhodanobacter</i> sp. 115                              | 389721634 | Sg2  | MTA/5'-dAdo/Ado Deaminase |
| <i>Rhodanobacter</i> sp. 116-2                            | 389797714 | Sg2  | MTA/5'-dAdo/Ado Deaminase |
| <i>Rhodanobacter</i> spathiphylli B39                     | 389774472 | Sg2  | MTA/5'-dAdo/Ado Deaminase |
| <i>Rhodanobacter</i> thiooxydans LCS2                     | 389806384 | Sg2  | MTA/5'-dAdo/Ado Deaminase |
| <i>Ricinus</i> communis                                   | 255594903 | Sg2  | MTA/5'-dAdo/Ado Deaminase |
| <i>Roseiflexus</i> castenholzii DSM 13941                 | 156744101 | Sg7  | 5'-dAdo/Ado Deaminase     |
| <i>Roseiflexus</i> sp. RS-1                               | 148658401 | Sg7  | 5'-dAdo/Ado Deaminase     |
| <i>Saccharophagus</i> degradans 2-40                      | 90021794  | Sg2  | MTA/5'-dAdo/Ado Deaminase |
| <i>Salinisphaera</i> shabanensis E1L3A                    | 335420684 | Sg2  | MTA/5'-dAdo/Ado Deaminase |
| <i>Selenomonas</i> ruminantium subsp. lactilytica TAM6421 | 383754018 | Sg1a | SAH/MTA Deaminase         |
| <i>Selenomonas</i> sp. CM52                               | 402833860 | Sg1a | SAH/MTA Deaminase         |
| <i>Selenomonas</i> sp. FOBRC6                             | 401564592 | Sg1a | SAH/MTA Deaminase         |
| <i>Selenomonas</i> sp. FOBRC9                             | 402301912 | Sg1a | SAH/MTA Deaminase         |
| <i>Selenomonas</i> sp. oral taxon 137 str. F0430          | 313895544 | Sg1a | SAH/MTA Deaminase         |
| <i>Simiduia</i> agarivorans SA1 = DSM 21679               | 410663080 | Sg2  | MTA/5'-dAdo/Ado Deaminase |
| <i>Sporolactobacillus</i> inulinus CASD                   | 374710320 | Sg9  | Guanine Deaminase         |
| <i>Sporolactobacillus</i> vineae DSM 21990 = SL153        | 404330030 | Sg9  | Guanine Deaminase         |
| <i>Stenotrophomonas</i> maltophilia D457                  | 386719260 | Sg2  | MTA/5'-dAdo/Ado Deaminase |
| <i>Stenotrophomonas</i> maltophilia JV3                   | 344208162 | Sg2  | MTA/5'-dAdo/Ado Deaminase |
| <i>Stenotrophomonas</i> maltophilia K279a                 | 190575196 | Sg2  | MTA/5'-dAdo/Ado Deaminase |
| <i>Stenotrophomonas</i> maltophilia R551-3                | 194366514 | Sg2  | MTA/5'-dAdo/Ado Deaminase |

|                                                   |           |     |                           |
|---------------------------------------------------|-----------|-----|---------------------------|
| Stenotrophomonas sp. SKA14                        | 254522291 | Sg2 | MTA/5'-dAdo/Ado Deaminase |
| Stigmatella aurantiaca DW4/3-1                    | 115373684 | Sg9 | Guanine Deaminase         |
| Stigmatella aurantiaca DW4/3-1                    | 310823592 | Sg9 | Guanine Deaminase         |
| Streptococcus anginosus 1_2_62CV                  | 319939966 | Sg5 | 5'-dAdo/Ado Deaminase     |
| Streptococcus anginosus F0211                     | 315222254 | Sg5 | 5'-dAdo/Ado Deaminase     |
| Streptococcus anginosus SK1138                    | 400374374 | Sg5 | 5'-dAdo/Ado Deaminase     |
| Streptococcus anginosus SK52 = DSM 20563          | 335032486 | Sg5 | 5'-dAdo/Ado Deaminase     |
| Streptococcus anginosus subsp. whileyi CCUG 39159 | 383340131 | Sg5 | 5'-dAdo/Ado Deaminase     |
| Streptococcus cristatus ATCC 51100                | 322385066 | Sg5 | 5'-dAdo/Ado Deaminase     |
| Streptococcus gordonii str. Challis substr. CH1   | 157150044 | Sg5 | 5'-dAdo/Ado Deaminase     |
| Streptococcus infantis ATCC 700779                | 322388284 | Sg5 | 5'-dAdo/Ado Deaminase     |
| Streptococcus infantis SK1076                     | 335029092 | Sg5 | 5'-dAdo/Ado Deaminase     |
| Streptococcus infantis SK970                      | 343391918 | Sg5 | 5'-dAdo/Ado Deaminase     |
| Streptococcus infantis X                          | 343400182 | Sg5 | 5'-dAdo/Ado Deaminase     |
| Streptococcus intermedius F0413                   | 355363819 | Sg5 | 5'-dAdo/Ado Deaminase     |
| Streptococcus intermedius JTH08                   | 392428100 | Sg5 | 5'-dAdo/Ado Deaminase     |
| Streptococcus mitis ATCC 6249                     | 306829721 | Sg5 | 5'-dAdo/Ado Deaminase     |
| Streptococcus mitis B6                            | 289167624 | Sg5 | 5'-dAdo/Ado Deaminase     |
| Streptococcus mitis bv. 2 str. F0392              | 340771138 | Sg5 | 5'-dAdo/Ado Deaminase     |
| Streptococcus mitis bv. 2 str. SK95               | 342833418 | Sg5 | 5'-dAdo/Ado Deaminase     |
| Streptococcus mitis NCTC 12261                    | 307701897 | Sg5 | 5'-dAdo/Ado Deaminase     |
| Streptococcus mitis SK1073                        | 339457332 | Sg5 | 5'-dAdo/Ado Deaminase     |
| Streptococcus mitis SK1080                        | 339455936 | Sg5 | 5'-dAdo/Ado Deaminase     |
| Streptococcus mitis SK321                         | 307706305 | Sg5 | 5'-dAdo/Ado Deaminase     |
| Streptococcus mitis SK564                         | 307708937 | Sg5 | 5'-dAdo/Ado Deaminase     |
| Streptococcus mitis SK569                         | 342837099 | Sg5 | 5'-dAdo/Ado Deaminase     |
| Streptococcus mitis SK575                         | 383350029 | Sg5 | 5'-dAdo/Ado Deaminase     |
| Streptococcus mitis SK579                         | 383353478 | Sg5 | 5'-dAdo/Ado Deaminase     |
| Streptococcus mitis SK597                         | 307705065 | Sg5 | 5'-dAdo/Ado Deaminase     |
| Streptococcus mitis SK616                         | 383344035 | Sg5 | 5'-dAdo/Ado Deaminase     |
| Streptococcus mitis SPAR10                        | 395876851 | Sg5 | 5'-dAdo/Ado Deaminase     |
| Streptococcus oralis ATCC 35037                   | 293365671 | Sg5 | 5'-dAdo/Ado Deaminase     |
| Streptococcus oralis SK10                         | 383186488 | Sg5 | 5'-dAdo/Ado Deaminase     |
| Streptococcus oralis SK100                        | 383184224 | Sg5 | 5'-dAdo/Ado Deaminase     |
| Streptococcus oralis SK1074                       | 383347755 | Sg5 | 5'-dAdo/Ado Deaminase     |
| Streptococcus oralis SK255                        | 334265937 | Sg5 | 5'-dAdo/Ado Deaminase     |
| Streptococcus oralis SK304                        | 400367786 | Sg5 | 5'-dAdo/Ado Deaminase     |
| Streptococcus oralis SK313                        | 343388443 | Sg5 | 5'-dAdo/Ado Deaminase     |
| Streptococcus oralis SK610                        | 383183371 | Sg5 | 5'-dAdo/Ado Deaminase     |
| Streptococcus oralis Uo5                          | 331266145 | Sg5 | 5'-dAdo/Ado Deaminase     |
| Streptococcus peroris ATCC 700780                 | 322392322 | Sg5 | 5'-dAdo/Ado Deaminase     |
| Streptococcus pneumoniae 2061376                  | 395594508 | Sg5 | 5'-dAdo/Ado Deaminase     |
| Streptococcus pneumoniae 2061617                  | 395600874 | Sg5 | 5'-dAdo/Ado Deaminase     |
| Streptococcus pneumoniae 2070005                  | 395573856 | Sg5 | 5'-dAdo/Ado Deaminase     |
| Streptococcus pneumoniae 2070035                  | 395574791 | Sg5 | 5'-dAdo/Ado Deaminase     |
| Streptococcus pneumoniae 2070108                  | 395579606 | Sg5 | 5'-dAdo/Ado Deaminase     |
| Streptococcus pneumoniae 2070335                  | 395583699 | Sg5 | 5'-dAdo/Ado Deaminase     |
| Streptococcus pneumoniae 2070531                  | 395587592 | Sg5 | 5'-dAdo/Ado Deaminase     |
| Streptococcus pneumoniae 2071004                  | 395602303 | Sg5 | 5'-dAdo/Ado Deaminase     |
| Streptococcus pneumoniae 2080913                  | 395607217 | Sg5 | 5'-dAdo/Ado Deaminase     |
| Streptococcus pneumoniae 2081074                  | 395608263 | Sg5 | 5'-dAdo/Ado Deaminase     |
| Streptococcus pneumoniae 2082170                  | 395613768 | Sg5 | 5'-dAdo/Ado Deaminase     |
| Streptococcus pneumoniae 2082239                  | 395613286 | Sg5 | 5'-dAdo/Ado Deaminase     |
| Streptococcus pneumoniae 2090008                  | 395575076 | Sg5 | 5'-dAdo/Ado Deaminase     |
| Streptococcus pneumoniae 459-5                    | 381316034 | Sg5 | 5'-dAdo/Ado Deaminase     |
| Streptococcus pneumoniae 70585                    | 225859123 | Sg5 | 5'-dAdo/Ado Deaminase     |
| Streptococcus pneumoniae ATCC 700669              | 221232098 | Sg5 | 5'-dAdo/Ado Deaminase     |
| Streptococcus pneumoniae CDC0288-04               | 183603522 | Sg5 | 5'-dAdo/Ado Deaminase     |
| Streptococcus pneumoniae CDC3059-06               | 168493257 | Sg5 | 5'-dAdo/Ado Deaminase     |
| Streptococcus pneumoniae CGSP14                   | 182684315 | Sg5 | 5'-dAdo/Ado Deaminase     |
| Streptococcus pneumoniae D39                      | 116515507 | Sg5 | 5'-dAdo/Ado Deaminase     |
| Streptococcus pneumoniae G54                      | 194397682 | Sg5 | 5'-dAdo/Ado Deaminase     |
| Streptococcus pneumoniae GA05578                  | 379637156 | Sg5 | 5'-dAdo/Ado Deaminase     |
| Streptococcus pneumoniae GA13224                  | 379552008 | Sg5 | 5'-dAdo/Ado Deaminase     |
| Streptococcus pneumoniae GA13637                  | 353812129 | Sg5 | 5'-dAdo/Ado Deaminase     |
| Streptococcus pneumoniae GA16531                  | 353769117 | Sg5 | 5'-dAdo/Ado Deaminase     |

|                                            |           |     |                       |
|--------------------------------------------|-----------|-----|-----------------------|
| Streptococcus pneumoniae GA17328           | 353827378 | Sg5 | 5'-dAdo/Ado Deaminase |
| Streptococcus pneumoniae GA17570           | 332073663 | Sg5 | 5'-dAdo/Ado Deaminase |
| Streptococcus pneumoniae GA40028           | 379574886 | Sg5 | 5'-dAdo/Ado Deaminase |
| Streptococcus pneumoniae GA40410           | 379578678 | Sg5 | 5'-dAdo/Ado Deaminase |
| Streptococcus pneumoniae GA41277           | 353838513 | Sg5 | 5'-dAdo/Ado Deaminase |
| Streptococcus pneumoniae GA41301           | 332074936 | Sg5 | 5'-dAdo/Ado Deaminase |
| Streptococcus pneumoniae GA41317           | 332200799 | Sg5 | 5'-dAdo/Ado Deaminase |
| Streptococcus pneumoniae GA41437           | 353841597 | Sg5 | 5'-dAdo/Ado Deaminase |
| Streptococcus pneumoniae GA43380           | 353849068 | Sg5 | 5'-dAdo/Ado Deaminase |
| Streptococcus pneumoniae GA44452           | 353764072 | Sg5 | 5'-dAdo/Ado Deaminase |
| Streptococcus pneumoniae GA47368           | 332201809 | Sg5 | 5'-dAdo/Ado Deaminase |
| Streptococcus pneumoniae GA47461           | 379595656 | Sg5 | 5'-dAdo/Ado Deaminase |
| Streptococcus pneumoniae GA47502           | 353748250 | Sg5 | 5'-dAdo/Ado Deaminase |
| Streptococcus pneumoniae GA47522           | 379599992 | Sg5 | 5'-dAdo/Ado Deaminase |
| Streptococcus pneumoniae GA47597           | 379599212 | Sg5 | 5'-dAdo/Ado Deaminase |
| Streptococcus pneumoniae GA52306           | 353867138 | Sg5 | 5'-dAdo/Ado Deaminase |
| Streptococcus pneumoniae GA54354           | 395889185 | Sg5 | 5'-dAdo/Ado Deaminase |
| Streptococcus pneumoniae GA60080           | 395900240 | Sg5 | 5'-dAdo/Ado Deaminase |
| Streptococcus pneumoniae GA60132           | 395909036 | Sg5 | 5'-dAdo/Ado Deaminase |
| Streptococcus pneumoniae gamPNI0373        | 410476740 | Sg5 | 5'-dAdo/Ado Deaminase |
| Streptococcus pneumoniae Hungary19A-6      | 169833999 | Sg5 | 5'-dAdo/Ado Deaminase |
| Streptococcus pneumoniae INV104            | 387626615 | Sg5 | 5'-dAdo/Ado Deaminase |
| Streptococcus pneumoniae JJA               | 225854804 | Sg5 | 5'-dAdo/Ado Deaminase |
| Streptococcus pneumoniae MLV-016           | 183603825 | Sg5 | 5'-dAdo/Ado Deaminase |
| Streptococcus pneumoniae Netherlands15B-37 | 353872354 | Sg5 | 5'-dAdo/Ado Deaminase |
| Streptococcus pneumoniae P1031             | 225856991 | Sg5 | 5'-dAdo/Ado Deaminase |
| Streptococcus pneumoniae R6                | 15458849  | Sg5 | 5'-dAdo/Ado Deaminase |
| Streptococcus pneumoniae R6                | 161410744 | Sg5 | 5'-dAdo/Ado Deaminase |
| Streptococcus pneumoniae SP11-BS70         | 148997592 | Sg5 | 5'-dAdo/Ado Deaminase |
| Streptococcus pneumoniae SP14-BS69         | 149004511 | Sg5 | 5'-dAdo/Ado Deaminase |
| Streptococcus pneumoniae SP18-BS74         | 149006995 | Sg5 | 5'-dAdo/Ado Deaminase |
| Streptococcus pneumoniae SP19-BS75         | 149011588 | Sg5 | 5'-dAdo/Ado Deaminase |
| Streptococcus pneumoniae SP23-BS72         | 149019308 | Sg5 | 5'-dAdo/Ado Deaminase |
| Streptococcus pneumoniae SP3-BS71          | 148985696 | Sg5 | 5'-dAdo/Ado Deaminase |
| Streptococcus pneumoniae SP6-BS73          | 148989473 | Sg5 | 5'-dAdo/Ado Deaminase |
| Streptococcus pneumoniae SP9-BS68          | 148993087 | Sg5 | 5'-dAdo/Ado Deaminase |
| Streptococcus pneumoniae SPNA45            | 405760708 | Sg5 | 5'-dAdo/Ado Deaminase |
| Streptococcus pneumoniae TCH8431/19A       | 298502696 | Sg5 | 5'-dAdo/Ado Deaminase |
| Streptococcus pneumoniae TIGR4             | 111656887 | Sg5 | 5'-dAdo/Ado Deaminase |
| Streptococcus pseudopneumoniae IS7493      | 342163987 | Sg5 | 5'-dAdo/Ado Deaminase |
| Streptococcus pseudopneumoniae SK674       | 383937960 | Sg5 | 5'-dAdo/Ado Deaminase |
| Streptococcus sanguinis ATCC 49296         | 315613384 | Sg5 | 5'-dAdo/Ado Deaminase |
| Streptococcus sanguinis SK1                | 327459442 | Sg5 | 5'-dAdo/Ado Deaminase |
| Streptococcus sanguinis SK1056             | 332358175 | Sg5 | 5'-dAdo/Ado Deaminase |
| Streptococcus sanguinis SK1057             | 327459045 | Sg5 | 5'-dAdo/Ado Deaminase |
| Streptococcus sanguinis SK1058             | 327490642 | Sg5 | 5'-dAdo/Ado Deaminase |
| Streptococcus sanguinis SK1059             | 332364739 | Sg5 | 5'-dAdo/Ado Deaminase |
| Streptococcus sanguinis SK1087             | 328945851 | Sg5 | 5'-dAdo/Ado Deaminase |
| Streptococcus sanguinis SK115              | 325689424 | Sg5 | 5'-dAdo/Ado Deaminase |
| Streptococcus sanguinis SK150              | 325693741 | Sg5 | 5'-dAdo/Ado Deaminase |
| Streptococcus sanguinis SK330              | 327468567 | Sg5 | 5'-dAdo/Ado Deaminase |
| Streptococcus sanguinis SK353              | 324990301 | Sg5 | 5'-dAdo/Ado Deaminase |
| Streptococcus sanguinis SK355              | 332364426 | Sg5 | 5'-dAdo/Ado Deaminase |
| Streptococcus sanguinis SK36               | 125717247 | Sg5 | 5'-dAdo/Ado Deaminase |
| Streptococcus sanguinis SK405              | 324992129 | Sg5 | 5'-dAdo/Ado Deaminase |
| Streptococcus sanguinis SK49               | 332363176 | Sg5 | 5'-dAdo/Ado Deaminase |
| Streptococcus sanguinis SK678              | 324994224 | Sg5 | 5'-dAdo/Ado Deaminase |
| Streptococcus sanguinis SK72               | 325688420 | Sg5 | 5'-dAdo/Ado Deaminase |
| Streptococcus sanguinis VMC66              | 323353448 | Sg5 | 5'-dAdo/Ado Deaminase |
| Streptococcus sp. 2_1_36FAA                | 262281915 | Sg5 | 5'-dAdo/Ado Deaminase |
| Streptococcus sp. AS14                     | 401682181 | Sg5 | 5'-dAdo/Ado Deaminase |
| Streptococcus sp. BS35b                    | 401684914 | Sg5 | 5'-dAdo/Ado Deaminase |
| Streptococcus sp. C300                     | 322375454 | Sg5 | 5'-dAdo/Ado Deaminase |
| Streptococcus sp. F0441                    | 410869346 | Sg5 | 5'-dAdo/Ado Deaminase |
| Streptococcus sp. GMD1S                    | 406587711 | Sg5 | 5'-dAdo/Ado Deaminase |
| Streptococcus sp. GMD2S                    | 404468846 | Sg5 | 5'-dAdo/Ado Deaminase |

|                                                       |           |      |                           |
|-------------------------------------------------------|-----------|------|---------------------------|
| Streptococcus sp. GMD6S                               | 406576640 | Sg5  | 5'-dAdo/Ado Deaminase     |
| Streptococcus sp. M143                                | 270292519 | Sg5  | 5'-dAdo/Ado Deaminase     |
| Streptococcus sp. oral taxon 056 str. F0418           | 339641238 | Sg5  | 5'-dAdo/Ado Deaminase     |
| Streptococcus sp. oral taxon 058 str. F0407           | 358464559 | Sg5  | 5'-dAdo/Ado Deaminase     |
| Streptococcus sp. oral taxon 071 str. 73H25AP         | 306825008 | Sg5  | 5'-dAdo/Ado Deaminase     |
| Streptococcus sp. SK140                               | 385260114 | Sg5  | 5'-dAdo/Ado Deaminase     |
| Streptococcus sp. SK643                               | 385262097 | Sg5  | 5'-dAdo/Ado Deaminase     |
| Sulfobacillus acidophilus DSM 10332                   | 379007998 | Sg9  | Guanine Deaminase         |
| Sulfobacillus acidophilus TPY                         | 339627639 | Sg9  | Guanine Deaminase         |
| Sulfuricella denitrificans skB26                      | 394989067 | Sg2  | MTA/5'-dAdo/Ado Deaminase |
| Sutterella parvirubra YIT 11816                       | 378822009 | Sg2  | MTA/5'-dAdo/Ado Deaminase |
| Sutterella wadsworthensis 2_1_59BFAA                  | 404657153 | Sg2  | MTA/5'-dAdo/Ado Deaminase |
| Sutterella wadsworthensis 3_1_45B                     | 319942536 | Sg2  | MTA/5'-dAdo/Ado Deaminase |
| Symbiobacterium thermophilum IAM 14863                | 51892841  | Sg1a | SAH/MTA Deaminase         |
| Syntrophobotulus glycolicus DSM 8271                  | 325290416 | Sg1a | SAH/MTA Deaminase         |
| Syntrophomonas wolfei subsp. wolfei str. Goettingen   | 114566319 | Sg1a | SAH/MTA Deaminase         |
| Syntrophothermus lipocalidus DSM 12680                | 297617458 | Sg1a | SAH/MTA Deaminase         |
| Tepidanaerobacter acetatoxydans Re1                   | 332799863 | Sg1a | SAH/MTA Deaminase         |
| Teredinibacter turnerae T7901                         | 254785507 | Sg2  | MTA/5'-dAdo/Ado Deaminase |
| Thauera sp. MZ1T                                      | 217970136 | Sg2  | MTA/5'-dAdo/Ado Deaminase |
| Thermacetogenium phaeum DSM 12270                     | 410667372 | Sg1a | SAH/MTA Deaminase         |
| Thermaerobacter marianensis DSM 12885                 | 317121933 | Sg1a | SAH/MTA Deaminase         |
| Thermincola potens JR                                 | 296133555 | Sg1a | SAH/MTA Deaminase         |
| Thermoanaerobacter ethanolicus CCSD1                  | 256751722 | Sg1a | SAH/MTA Deaminase         |
| Thermoanaerobacter ethanolicus JW 200                 | 326389977 | Sg1a | SAH/MTA Deaminase         |
| Thermoanaerobacter italicus Ab9                       | 289578629 | Sg1a | SAH/MTA Deaminase         |
| Thermoanaerobacter mathranii subsp. mathranii str. A3 | 297544852 | Sg1a | SAH/MTA Deaminase         |
| Thermoanaerobacter pseudethanolicus ATCC 33223        | 167037289 | Sg1a | SAH/MTA Deaminase         |
| Thermoanaerobacter tengcongensis MB4                  | 20808022  | Sg1a | SAH/MTA Deaminase         |
| Thermoanaerobacter wiegellii Rt8.B1                   | 345017876 | Sg1a | SAH/MTA Deaminase         |
| Thermococcus barophilus MP                            | 315231643 | Sg1b | SAH/MTA/5'-dAdo Deaminase |
| Thermococcus gammatolerans EJ3                        | 240102195 | Sg1b | SAH/MTA/5'-dAdo Deaminase |
| Thermococcus kodakarensis KOD1                        | 57641826  | Sg1b | SAH/MTA/5'-dAdo Deaminase |
| Thermococcus litoralis DSM 5473                       | 375084151 | Sg1b | SAH/MTA/5'-dAdo Deaminase |
| Thermococcus onnurineus NA1                           | 212224804 | Sg1b | SAH/MTA/5'-dAdo Deaminase |
| Thermococcus sibiricus MM 739                         | 242399953 | Sg1b | SAH/MTA/5'-dAdo Deaminase |
| Thermococcus sp. 4557                                 | 341582507 | Sg1b | SAH/MTA/5'-dAdo Deaminase |
| Thermococcus sp. AM4                                  | 223477357 | Sg1b | SAH/MTA/5'-dAdo Deaminase |
| Thermococcus sp. CL1                                  | 390961208 | Sg1b | SAH/MTA/5'-dAdo Deaminase |
| Thermococcus zilligii AN1                             | 409096367 | Sg1b | SAH/MTA/5'-dAdo Deaminase |
| Thermoplasma acidophilum                              | 10640374  | Sg11 | SAH Deaminase             |
| Thermoplasma acidophilum DSM 1728                     | 16082586  | Sg11 | SAH Deaminase             |
| Thermoplasma volcanium GSS1                           | 13541346  | Sg11 | SAH Deaminase             |
| Thermosinus carboxydivorans Nor1                      | 121535792 | Sg1a | SAH/MTA Deaminase         |
| Thermosiphon africanus H17ap60334                     | 407514376 | Sg8  | SAH/MTA Deaminase         |
| Thermosiphon africanus TCF52B                         | 217077947 | Sg8  | SAH/MTA Deaminase         |
| Thermosiphon melanesiensis B1429                      | 150021441 | Sg8  | SAH/MTA Deaminase         |
| Thermotoga lettingae TMO                              | 157363801 | Sg8  | SAH/MTA Deaminase         |
| Thermotoga maritima MSB8                              | 15643698  | Sg8  | SAH/MTA Deaminase         |
| Thermotoga naphthophila RKU-10                        | 281413203 | Sg8  | SAH/MTA Deaminase         |
| Thermotoga neapolitana DSM 4359                       | 222100614 | Sg8  | SAH/MTA Deaminase         |
| Thermotoga petrophila RKU-1                           | 148270922 | Sg8  | SAH/MTA Deaminase         |
| Thermotoga sp. EMP                                    | 403252676 | Sg8  | SAH/MTA Deaminase         |
| Thermotoga sp. RQ2                                    | 170289617 | Sg8  | SAH/MTA Deaminase         |
| Thermotoga thermarum DSM 5069                         | 338730352 | Sg8  | SAH/MTA Deaminase         |
| Thioalkalivibrio sp. K90mix                           | 289208680 | Sg2  | MTA/5'-dAdo/Ado Deaminase |
| Thioalkalivibrio sulfidophilus HL-EbGr7               | 220934703 | Sg2  | MTA/5'-dAdo/Ado Deaminase |
| Thioalkalivibrio thiocyanoxidans ARh 4                | 350560955 | Sg2  | MTA/5'-dAdo/Ado Deaminase |
| Thiobacillus denitrificans ATCC 25259                 | 74316965  | Sg2  | MTA/5'-dAdo/Ado Deaminase |
| Thiocapsa marina 5811                                 | 344339504 | Sg2  | MTA/5'-dAdo/Ado Deaminase |
| Thiocystis violascens DSM 198                         | 390951578 | Sg2  | MTA/5'-dAdo/Ado Deaminase |
| Thiorhodococcus dreswii AZ1                           | 345869285 | Sg2  | MTA/5'-dAdo/Ado Deaminase |
| Thiorhodospira sibirica ATCC 700588                   | 350553685 | Sg2  | MTA/5'-dAdo/Ado Deaminase |
| Thiorhodovibrio sp. 970                               | 381157376 | Sg2  | MTA/5'-dAdo/Ado Deaminase |
| Thiothrix nivea DSM 5205                              | 386815608 | Sg2  | MTA/5'-dAdo/Ado Deaminase |
| uncultured bacterium                                  | 407007146 | Sg10 | 8-Oxoadenine Deaminase    |

|                                                         |           |      |                           |
|---------------------------------------------------------|-----------|------|---------------------------|
| uncultured bacterium                                    | 406883814 | Sg1b | SAH/MTA/5'-dAdo Deaminase |
| uncultured bacterium                                    | 406902473 | Sg2  | MTA/5'-dAdo/Ado Deaminase |
| uncultured bacterium                                    | 406915765 | Sg2  | MTA/5'-dAdo/Ado Deaminase |
| uncultured bacterium                                    | 406941479 | Sg2  | MTA/5'-dAdo/Ado Deaminase |
| uncultured bacterium                                    | 406943346 | Sg2  | MTA/5'-dAdo/Ado Deaminase |
| uncultured bacterium                                    | 406946171 | Sg2  | MTA/5'-dAdo/Ado Deaminase |
| uncultured bacterium                                    | 406982005 | Sg9  | Guanine Deaminase         |
| uncultured haloarchaeon                                 | 148508286 | Sg1b | SAH/MTA/5'-dAdo Deaminase |
| uncultured haloarchaeon                                 | 148508263 | Sg9  | Guanine Deaminase         |
| Veillonella atypica ACS-049-V-Sch6                      | 303231426 | Sg1a | SAH/MTA Deaminase         |
| Veillonella atypica ACS-134-V-Col7a                     | 303228970 | Sg1a | SAH/MTA Deaminase         |
| Veillonella parvula ACS-068-V-Sch12                     | 333977040 | Sg1a | SAH/MTA Deaminase         |
| Veillonella parvula ATCC 17745                          | 282850234 | Sg1a | SAH/MTA Deaminase         |
| Veillonella parvula DSM 2008                            | 269798007 | Sg1a | SAH/MTA Deaminase         |
| Veillonella sp. 3_1_44                                  | 294793747 | Sg1a | SAH/MTA Deaminase         |
| Veillonella sp. 6_1_27                                  | 294791887 | Sg1a | SAH/MTA Deaminase         |
| Veillonella sp. ACP1                                    | 401679851 | Sg1a | SAH/MTA Deaminase         |
| Veillonella sp. oral taxon 158 str. F0412               | 313894498 | Sg1a | SAH/MTA Deaminase         |
| Veillonella sp. oral taxon 780 str. F0422               | 342214436 | Sg1a | SAH/MTA Deaminase         |
| Xanthomonas albilineans GPE PC73                        | 285018688 | Sg2  | MTA/5'-dAdo/Ado Deaminase |
| Xanthomonas axonopodis pv. citri str. 306               | 21243112  | Sg2  | MTA/5'-dAdo/Ado Deaminase |
| Xanthomonas axonopodis pv. citrumelo F1                 | 346725272 | Sg2  | MTA/5'-dAdo/Ado Deaminase |
| Xanthomonas axonopodis pv. malvacearum str. GSPB2388    | 410700374 | Sg2  | MTA/5'-dAdo/Ado Deaminase |
| Xanthomonas axonopodis pv. punicae str. LMG 859         | 390992333 | Sg2  | MTA/5'-dAdo/Ado Deaminase |
| Xanthomonas campestris pv. campestris str. ATCC 33913   | 21231708  | Sg2  | MTA/5'-dAdo/Ado Deaminase |
| Xanthomonas campestris pv. campestris str. B100         | 188991303 | Sg2  | MTA/5'-dAdo/Ado Deaminase |
| Xanthomonas campestris pv. musacearum NCPPB 4381        | 289671283 | Sg2  | MTA/5'-dAdo/Ado Deaminase |
| Xanthomonas campestris pv. raphani 756C                 | 384428174 | Sg2  | MTA/5'-dAdo/Ado Deaminase |
| Xanthomonas campestris pv. vasculorum NCPPB 702         | 289665703 | Sg2  | MTA/5'-dAdo/Ado Deaminase |
| Xanthomonas campestris pv. vesicatoria str. 85-10       | 78048131  | Sg2  | MTA/5'-dAdo/Ado Deaminase |
| Xanthomonas citri pv. mangiferaeindicae LMG 941         | 381171484 | Sg2  | MTA/5'-dAdo/Ado Deaminase |
| Xanthomonas fuscans subsp. aurantifolii str. ICPB 11122 | 294624431 | Sg2  | MTA/5'-dAdo/Ado Deaminase |
| Xanthomonas gardneri ATCC 19865                         | 325921158 | Sg2  | MTA/5'-dAdo/Ado Deaminase |
| Xanthomonas oryzae pv. oryzae KACC 10331                | 58582326  | Sg2  | MTA/5'-dAdo/Ado Deaminase |
| Xanthomonas oryzae pv. oryzae MAFF 311018               | 84624206  | Sg2  | MTA/5'-dAdo/Ado Deaminase |
| Xanthomonas oryzae pv. oryzae PXO99A                    | 188576191 | Sg2  | MTA/5'-dAdo/Ado Deaminase |
| Xanthomonas oryzae pv. oryzicola BLS256                 | 384419078 | Sg2  | MTA/5'-dAdo/Ado Deaminase |
| Xanthomonas perforans 91-118                            | 325926496 | Sg2  | MTA/5'-dAdo/Ado Deaminase |
| Xanthomonas sacchari NCPPB 4393                         | 380512828 | Sg2  | MTA/5'-dAdo/Ado Deaminase |
| Xanthomonas vesicatoria ATCC 35937                      | 325918739 | Sg2  | MTA/5'-dAdo/Ado Deaminase |
| Xylella fastidiosa 9a5c                                 | 15839062  | Sg2  | MTA/5'-dAdo/Ado Deaminase |
| Xylella fastidiosa Dixon                                | 71276240  | Sg2  | MTA/5'-dAdo/Ado Deaminase |
| Xylella fastidiosa M23                                  | 182682097 | Sg2  | MTA/5'-dAdo/Ado Deaminase |
| Xylella fastidiosa Temecula1                            | 28199370  | Sg2  | MTA/5'-dAdo/Ado Deaminase |
| Yokenella regensburgei ATCC 43003                       | 365847690 | Sg10 | 8-Oxoadenine Deaminase    |

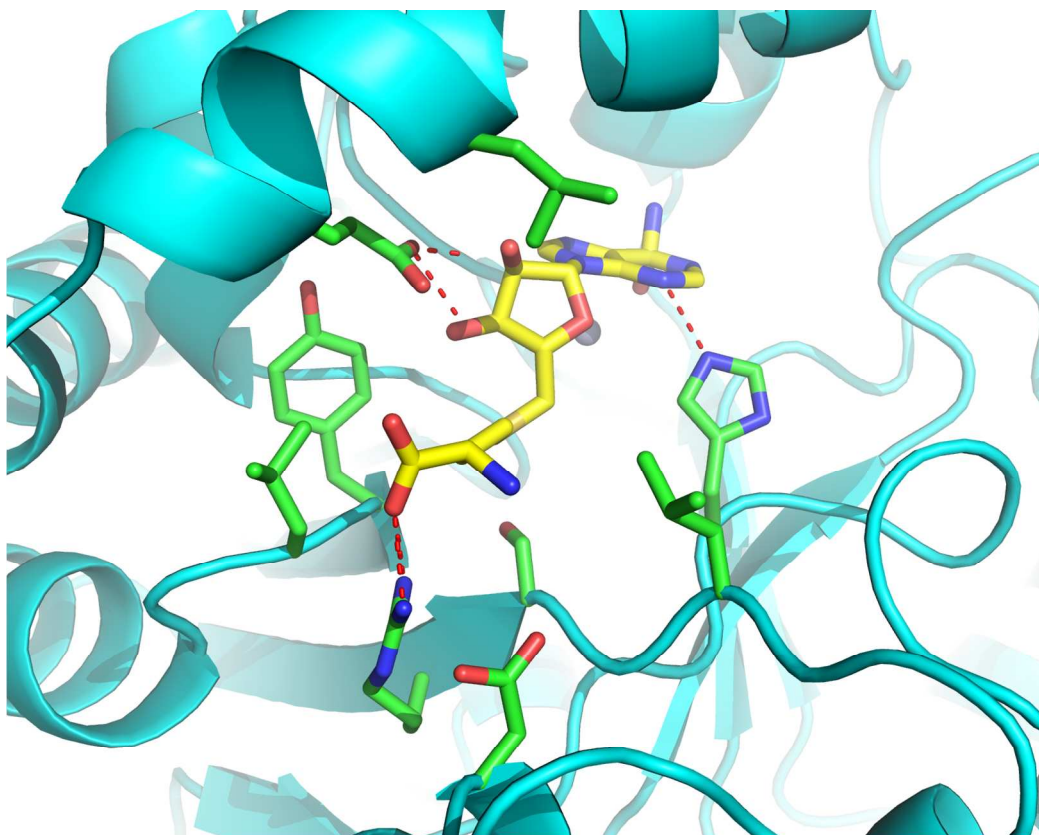

**Figure S1.** In the modeled active sites of Cthe1199 (cyan cartoon, green stick), the carboxylate and the amino groups of the homocysteine moiety of the docked SAH (yellow stick) interact with Arg-147 and Asp-159.

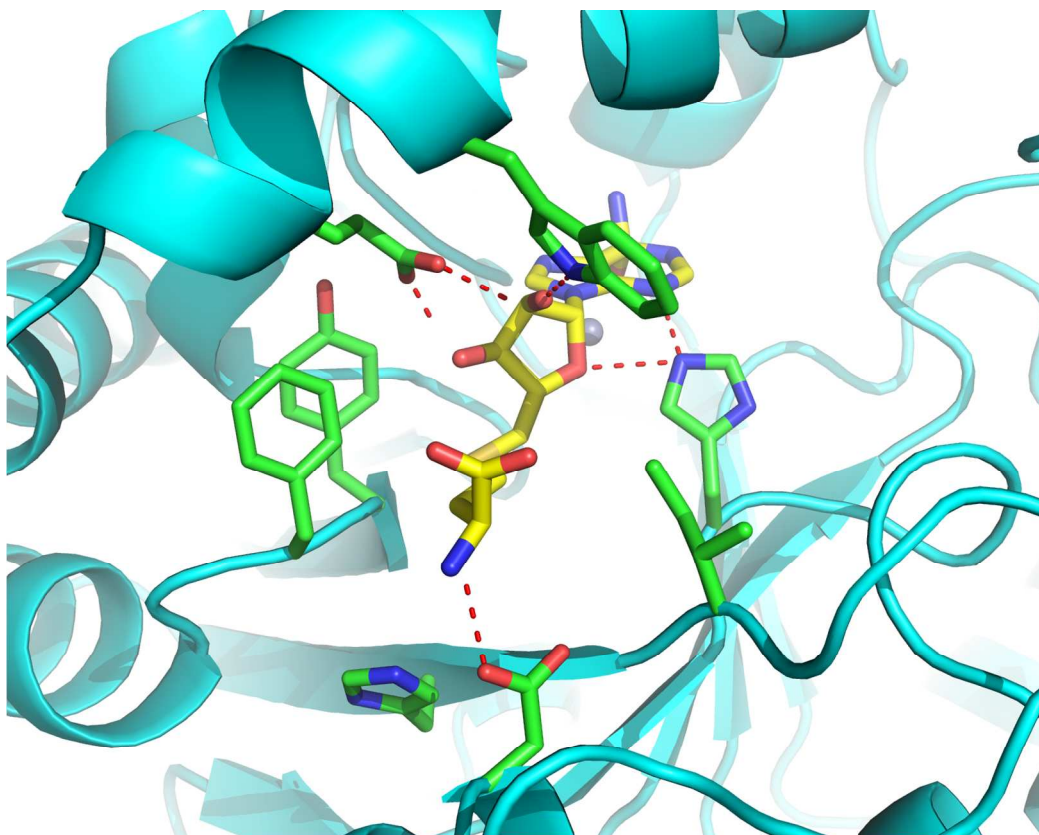

**Figure S2.** In the modeled active sites of Mm2279 (cyan cartoon, green stick), the amino group of the homocysteine moiety of the docked SAH (yellow stick) interacts with His-169 and Asp-183.



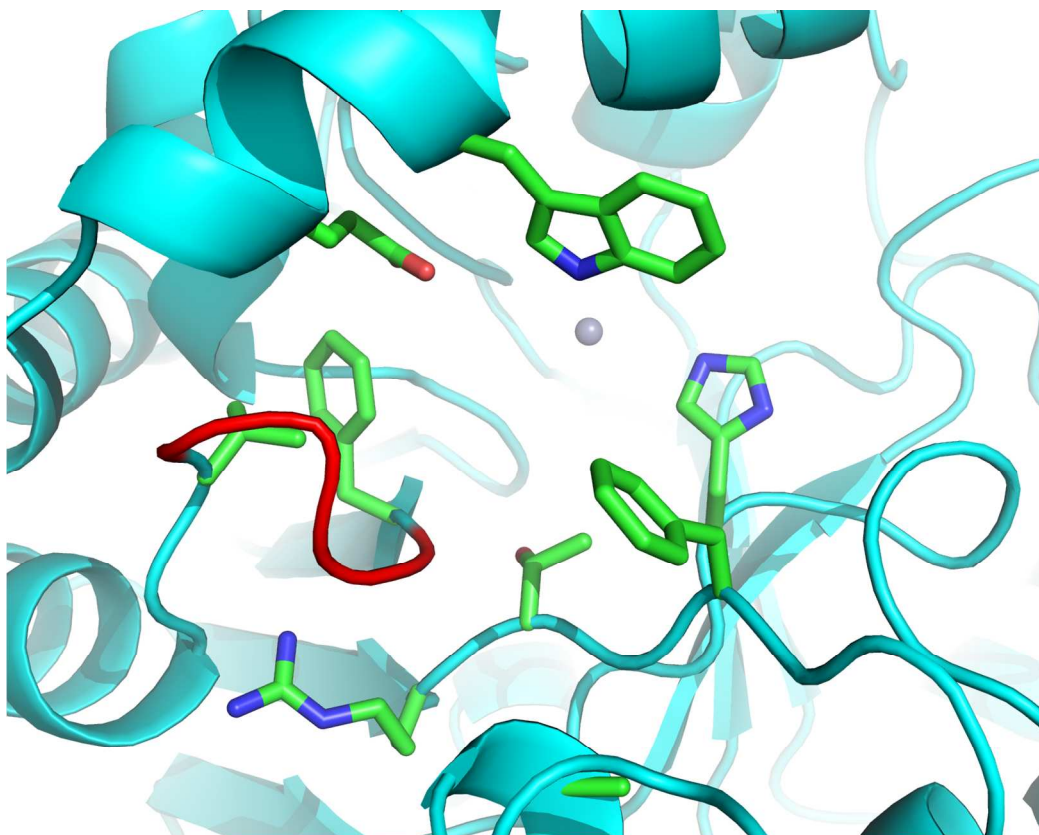

**Figure S3.** In the modeled active sites of Bc1793 (cyan cartoon, green stick), the inserted loop (red cartoon) from residue positions 126-129 prevents the conserved Arg-150 from interacting with bound substrates.

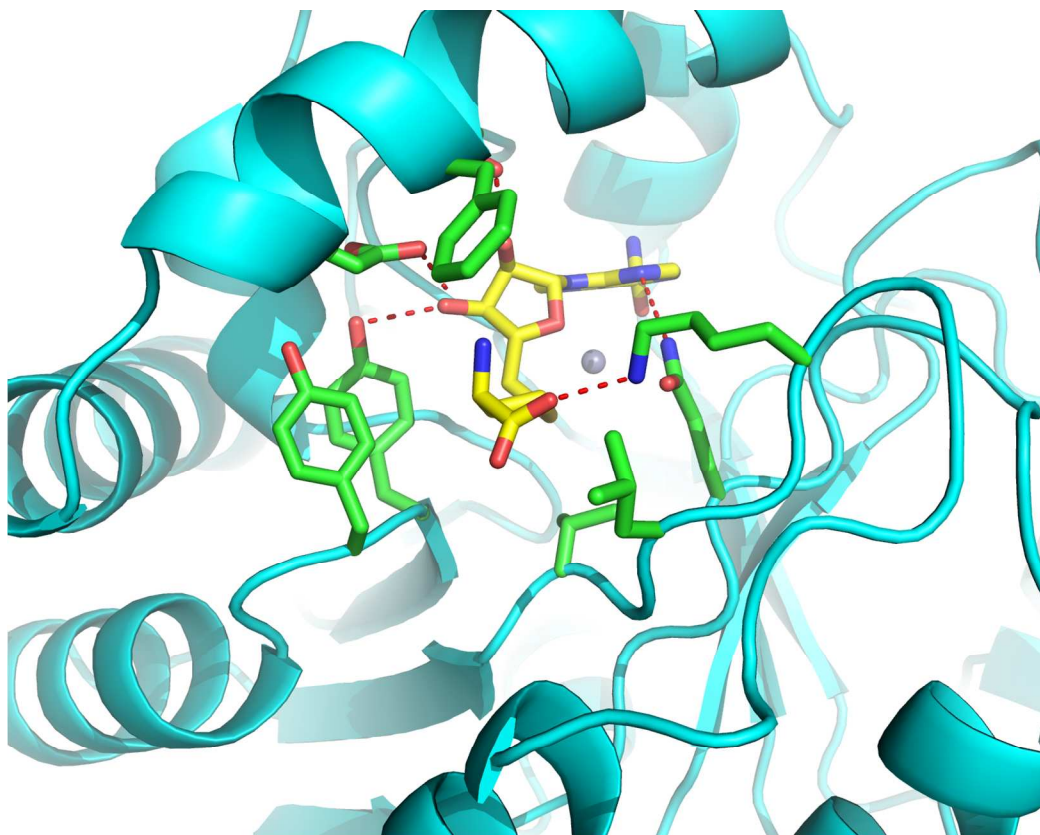

**Figure S4.** In the modeled active sites of Tvn0515 (cyan cartoon, green stick), the carboxylate group in the homocysteine moiety of the docked SAH (yellow stick) forms a hydrogen bond with the sidechain from Lys-145, while the amino group in the homocysteine moiety of the docked SAH was exposed to the protein surface and formed cation- $\pi$  interaction with the sidechain from Phe-85 .

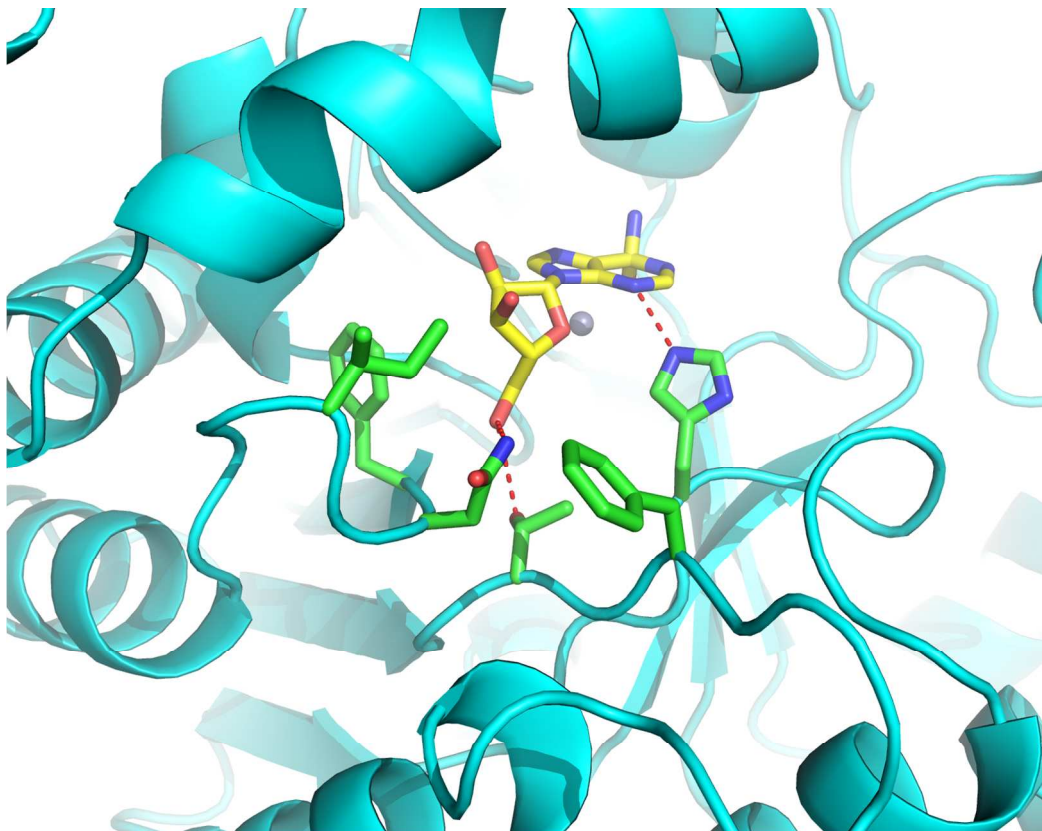

**Figure S5.** In the modeled active sites of Bc1793 (cyan cartoon, green stick), the 5'-hydroxyl group of the docked adenosine forms a hydrogen bond with the side chain of the conserved Thr-151. The neighboring Phe-153 could prevent the binding of MTA.

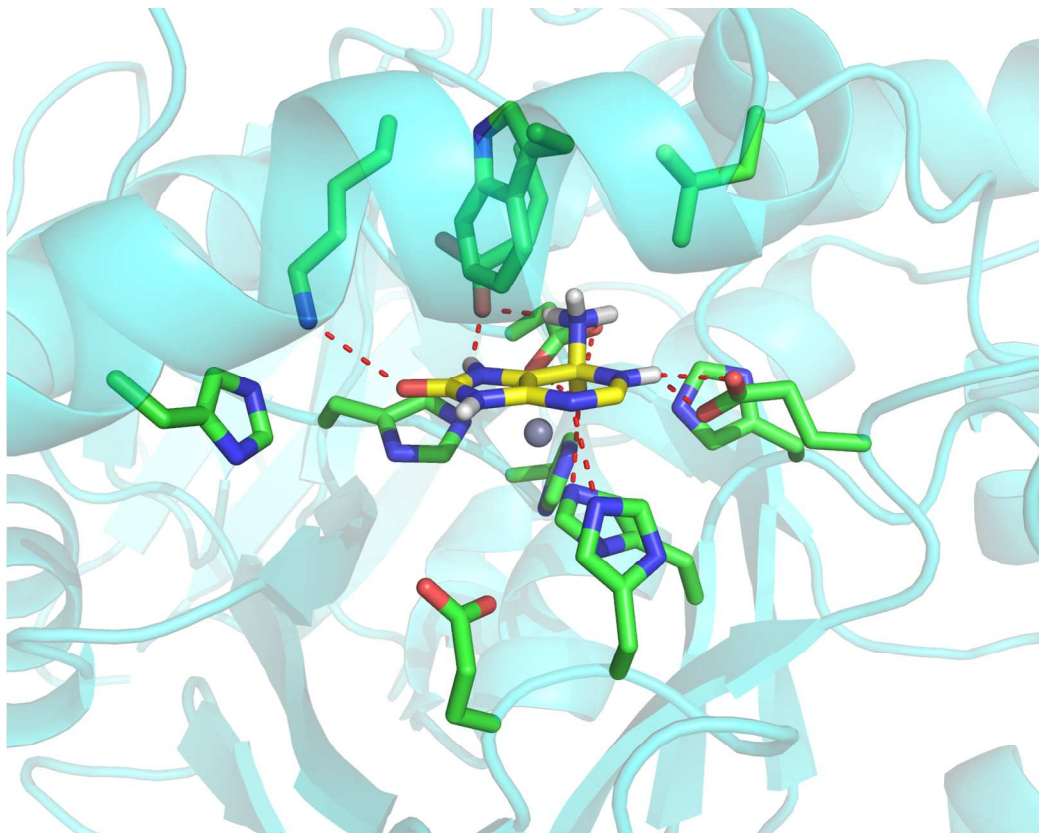

**Figure S6.** In the modeled active sites of Avi5431 (transparent cyan cartoon, solid green stick), the N3 nitrogen and the C8 carbonyl oxygen from the purine ring of the docked 8-oxoadenine interact with His-190 and Lys-308.

## **Acknowledgements**

X-ray diffraction data for this study were measured at beamlines X29 of the National Synchrotron Light Source (NSLS), Brookhaven National Laboratory, and Lilly Research Laboratory Collaborative Access Team (LRL-CAT) at the Advanced Photon Source, Argonne National Laboratory. Use of the NSLS beamline is supported by the Center for Synchrotron Biosciences grant, P30-EB-009998, from the National Institute of Biomedical Imaging and Bioengineering (NIBIB) and by the U.S. Department of Energy, Office of Science, Office of Basic Energy Sciences, under Contract No. DE-AC02-98CH10886. Use of the Advanced Photon Source at Argonne National Laboratory was supported by the U. S. Department of Energy, Office of Science, Office of Basic Energy Sciences, under Contract No. DE-AC02-06CH11357. Use of the Lilly Research Laboratories Collaborative Access Team (LRL-CAT) beamline at Sector 31 of the Advanced Photon Source was provided by Eli Lilly Company, which operates the facility.

## References

1. Minor, W., Cymborowski, M., Otwinowski Z. Chruszcz, M. (2006) *Acta Crystallogr D Biol Crystallogr* **62**(Pt 8):859-866.
2. Zwart P. H., et al. (2008) *Methods Mol Biol* **426**:419-435.
3. Hendrickson, W. A, Horton, J. R., LeMaster, D. M. (1990) *EMBO J* **9**(5):1665-1672.
4. Perrakis, A. (1997) *Acta Cryst.* **D53**(Pt 4):448-455.
5. McCoy, A. J., et al. (2007) *J Appl Crystallogr* **40**(Pt 4):658-674.
6. Emsley, P., Cowtan K (2004) *Acta Crystallogr D Biol Crystallogr* **D60**(Pt 12 Pt 1):2126-2132.
7. Murshudov, G. N., Vagin, A. A, Dodson, E. J. (1997) *Acta Crystallogr D Biol Crystallogr* **D53**(Pt 3):240-255.
8. Schuttelkopf, A. W., van Aalten, D. M. (2004) *Acta Cryst.* **D60**(Pt 8):1355-1363.
